# Supplementary material for: First evidence of underwater vocalisations in hunting penguins
Source: PeerJ. 2019 Dec 18;7:e8240. doi: 10.7717/peerj.8240 (PMC6966993; doi:10.7717/peerj.8240)
Supplement: Supplemental Information 1 [file peerj-07-8240-s001.xlsx]

## Sheet: Sheet1
Species	IndividualID	FileName	DiveID	DiveT1	DiveT2	CallT1	CallT2	Fmax	F0	PrevAcceleroT1	PrevAcceleroT2	DiveType	DivePhase	TimeCaptFol	Consp
KPN	KPN15	KPN15_022018_RPXD001.wav	2	236.4	486.3	316.081	316.133	1350		312.89	315.3	PEL	bot	316.116	Y
KPN	KPN15	KPN15_022018_RPXD001.wav	3	559.2	835.3	696.097	696.15	670	568	687.63	695.77	PEL	bot	696.163	Y
KPN	KPN15	KPN15_022018_RPXD002.wav	5	460.7	751	623.424	623.537	703		609.01	620.4	PEL	bot	623.702	Y
KPN	KPN15	KPN15_022018_RPXD003.wav	6	208.3	482.2	355.761	355.819	680	673	343.74	353.7	PEL	bot	355.822	N
KPN	KPN15	KPN15_022018_RPXD003.wav	6	208.3	482.2	387.674	387.733	710	719	386.48	387.61	PEL	bot	387.788	N
KPN	KPN15	KPN15_022018_RPXD003.wav	6	208.3	482.2	389.111	389.172	700	699	388.34	388.81	PEL	bot	389.226	N
KPN	KPN15	KPN15_022018_RPXD003.wav	7	546.2	819.2	678.007	678.046	670	522	669.97	677.73	PEL	bot	678.045	Y
KPN	KPN15	KPN15_022018_RPXD003.wav	7	546.2	819.2	694.604	694.643	670		690.52	693.65	PEL	bot	694.628	Y
KPN	KPN15	KPN15_022018_RPXD003.wav	7	546.2	819.2	697.297	697.341	680	351	695.21	696.39	PEL	bot	697.364	Y
KPN	KPN15	KPN15_022018_RPXD003.wav	7	546.2	819.2	759.375	759.466	726	707	749.66	758.55	PEL	asc	759.426	Y
KPN	KPN15	KPN15_022018_RPXD004.wav	8	0	214	87.0795	87.1465	648	321	85.56	86.69	PEL	bot	87.154	Y
KPN	KPN15	KPN15_022018_RPXD005.wav	10	0	258.3	169.17	169.205	670	629	162.3	168.43	PEL	bot	169.264	N
KPN	KPN15	KPN15_022018_RPXD005.wav	10	0	258.3	169.929	169.997	843	850	162.3	168.43	PEL	bot	NA	N
KPN	KPN15	KPN15_022018_RPXD005.wav	10	0	258.3	170.411	170.482	710	720	162.3	168.43	PEL	bot	NA	N
KPN	KPN15	KPN15_022018_RPXD005.wav	10	0	258.3	179.689	179.75	650	597	176.63	178.29	PEL	bot	179.78	N
KPN	KPN15	KPN15_022018_RPXD005.wav	10	0	258.3	182.036	182.107	742	730	180.89	181.96	PEL	bot	182.149	N
KPN	KPN15	KPN15_022018_RPXD005.wav	10	0	258.3	190.074	190.167	734	741	185.12	189.49	PEL	bot	190.157	N
KPN	KPN15	KPN15_022018_RPXD007.wav	12	0	181.3	78.5676	78.6483	921	461	67.48	77.86	PEL	bot	78.612	N
KPN	KPN24	KPN24_032018_RPXD002.wav	2	672.82	804.84	769.115	769.159	1980	393	760.95	768.4	PEL	bot	NA	N
KPN	KPN24	KPN24_032018_RPXD002.wav	2	672.82	804.84	784.791	784.812	1210	309	777.58	783.86	PEL	bot	NA	N
KPN	KPN24	KPN24_032018_RPXD002.wav	2	672.82	804.84	797.223	797.27	1450	380	786.14	792.49	PEL	bot	NA	N
KPN	KPN24	KPN24_032018_RPXD002.wav	2	672.82	804.84	802.282	802.351	1164	393	795.24	801.02	PEL	bot	NA	N
KPN	KPN24	KPN24_032018_RPXD003.wav	4	165.5	349.4	217.291	217.352	1500		NA	NA	PEL	desc	NA	N
KPN	KPN24	KPN24_032018_RPXD003.wav	4	165.5	349.4	218.073	218.1			NA	NA	PEL	desc	NA	N
KPN	KPN24	KPN24_032018_RPXD003.wav	4	165.5	349.4	220.855	220.923	1531		NA	NA	PEL	desc	NA	N
KPN	KPN24	KPN24_032018_RPXD003.wav	4	165.5	349.4	221.517	221.593			NA	NA	PEL	desc	NA	N
KPN	KPN24	KPN24_032018_RPXD003.wav	4	165.5	349.4	239.849	239.909			NA	NA	PEL	desc	NA	N
KPN	KPN24	KPN24_032018_RPXD003.wav	4	165.5	349.4	250.105	250.155			236	249.88	PEL	bot	250.484	N
KPN	KPN24	KPN24_032018_RPXD003.wav	4	165.5	349.4	260.696	260.772	1187	398	257.34	258.77	PEL	bot	260.928	N
KPN	KPN24	KPN24_032018_RPXD003.wav	4	165.5	349.4	265.972	266.044	1507	393	261.22	265.42	PEL	bot	266.133	N
KPN	KPN24	KPN24_032018_RPXD003.wav	4	165.5	349.4	288.139	288.315	1496	382	283.2	287.71	PEL	bot	NA	N
KPN	KPN24	KPN24_032018_RPXD003.wav	4	165.5	349.4	307.655	307.708			305.24	307.38	PEL	bot	NA	N
KPN	KPN24	KPN24_032018_RPXD003.wav	4	165.5	349.4	313.056	313.092			309.87	312.18	PEL	bot	NA	N
KPN	KPN24	KPN24_032018_RPXD003.wav	4	165.5	349.4	331.701	331.731	1430	366	313.51	330.53	PEL	bot	331.765	N
MRP	MPR19	MRP19_122017_RPXD0005.wav	3	18.5	172.5	124.095	124.149	680	697	120.15	123.05	PEL	bot	124.214	N
GTP	GTP04	GTP04_082017_RPXD0002.wav	1	0	192.9	30.2199	30.2754	1530	308	25.17	27.85	BENT	bot	NA	N
GTP	GTP04	GTP04_082017_RPXD0002.wav	1	0	192.9	115.205	115.233			NA	NA	BENT	bot	NA	N
GTP	GTP04	GTP04_082017_RPXD0002.wav	2	293.2	558.5	402.519	402.57			385.91	400.57	BENT	bot	NA	N
GTP	GTP04	GTP04_082017_RPXD0002.wav	2	293.2	558.5	403.715	403.738	1210		385.91	400.57	BENT	bot	NA	N
GTP	GTP04	GTP04_082017_RPXD0002.wav	2	293.2	558.5	430.726	430.78	1500	252	427.37	430.22	BENT	bot	NA	N
GTP	GTP05	GTP05_082017_RPXD0002.wav	1	0	84.37	9.9644	10.0255	750		6.93	7.62	PEL	asc	10.01	N
GTP	GTP05	GTP05_082017_RPXD0002.wav	2	280.4	594.6	445.679	445.794	1054	213	443	445.37	BENT	bot	NA	N
GTP	GTP05	GTP05_082017_RPXD0002.wav	2	280.4	594.6	446.655	446.712	650	216	443	445.37	BENT	bot	NA	N
GTP	GTP05	GTP05_082017_RPXD0002.wav	2	280.4	594.6	449.25	449.298	900	220	443	445.37	BENT	bot	NA	N
GTP	GTP05	GTP05_082017_RPXD0002.wav	2	280.4	594.6	449.719	449.772	1040	218	443	445.37	BENT	bot	NA	N
GTP	GTP05	GTP05_082017_RPXD0002.wav	2	280.4	594.6	449.876	449.922	1040	335	443	445.37	BENT	bot	NA	N
GTP	GTP05	GTP05_082017_RPXD0002.wav	2	280.4	594.6	451.187	451.231	650	339	443	445.37	BENT	bot	NA	N
GTP	GTP05	GTP05_082017_RPXD0002.wav	2	280.4	594.6	464.59	464.629	650	316	NA	NA	BENT	bot	NA	N
GTP	GTP05	GTP05_082017_RPXD0002.wav	2	280.4	594.6	467.276	467.32	930	466	NA	NA	BENT	bot	NA	N
GTP	GTP05	GTP05_082017_RPXD0003.wav	3	680	854.8	816.613	816.663	480	452	811.72	815.96	BENT	bot	NA	N
GTP	GTP05	GTP05_082017_RPXD0003.wav	3	680	854.8	821.083	821.151	554	281	NA	NA	BENT	bot	NA	N
GTP	GTP05	GTP05_082017_RPXD0003.wav	3	680	854.8	847.655	847.702			838.29	846.27	BENT	bot	NA	N
GTP	GTP06	GTP06_082017_RPXD0003.wav	2	21.7	282.6	149.455	149.496			135.51	142.92	BENT	bot	NA	N
GTP	GTP06	GTP06_082017_RPXD0003.wav	2	21.7	282.6	155.036	155.087	1590	306	NA	NA	BENT	bot	NA	N
GTP	GTP06	GTP06_082017_RPXD0004.wav	3	0	132.33	7.49893	7.51931	1650	336	NA	NA	BENT	bot	NA	N
GTP	GTP06	GTP06_082017_RPXD0004.wav	3	0	132.33	23.2542	23.2861	1620	272	8.99	19.41	BENT	bot	NA	N
GTP	GTP06	GTP06_082017_RPXD0005.wav	4	49.3	185.38	117.279	117.312	1560		NA	NA	BENT	bot	NA	N
GTP	GTP06	GTP06_082017_RPXD0005.wav	4	49.3	185.38	119.226	119.263	1570	393	NA	NA	BENT	bot	NA	N
GTP	GTP06	GTP06_082017_RPXD0005.wav	4	49.3	185.38	134.392	134.429	1730		122.26	130.28	BENT	bot	NA	N
GTP	GTP06	GTP06_082017_RPXD0005.wav	4	49.3	185.38	151.642	151.671	1620		139.27	144.81	BENT	bot	NA	N
GTP	GTP06	GTP06_082017_RPXD0006.wav	5	53.98	181.41	150.87	150.895	1590		NA	NA	BENT	bot	NA	N
GTP	GTP06	GTP06_082017_RPXD0006.wav	5	53.98	181.41	164.132	164.165			NA	NA	BENT	bot	NA	N
GTP	GTP06	GTP06_082017_RPXD0006.wav	5	53.98	181.41	165.487	165.506	1530		NA	NA	BENT	bot	NA	N
GTP	GTP07	GTP07_082017_RPXD0001.wav	1	302.8	552.1	376.35	376.39	1290	652	NA	NA	BENT	desc	NA	N
GTP	GTP07	GTP07_082017_RPXD0001.wav	1	302.8	552.1	403.475	403.521	1340	1025	NA	NA	BENT	bot	NA	N
GTP	GTP07	GTP07_082017_RPXD0001.wav	1	302.8	552.1	415.499	415.526	1460	744	NA	NA	BENT	bot	NA	N
GTP	GTP07	GTP07_082017_RPXD0001.wav	1	302.8	552.1	429.502	429.591	1320	660	418.96	427.63	BENT	bot	NA	N
GTP	GTP07	GTP07_082017_RPXD0001.wav	1	302.8	552.1	430.013	430.063	1280	425	418.96	427.63	BENT	bot	430.097	N
GTP	GTP07	GTP07_082017_RPXD0001.wav	1	302.8	552.1	430.875	430.928	1450	1441	418.96	427.63	BENT	bot	NA	N
GTP	GTP07	GTP07_082017_RPXD0001.wav	1	302.8	552.1	433.989	434.019	1340	650	418.96	427.63	BENT	bot	NA	N
GTP	GTP07	GTP07_082017_RPXD0001.wav	1	302.8	552.1	444.498	444.64	1441	371	NA	NA	BENT	bot	NA	N
GTP	GTP07	GTP07_082017_RPXD0001.wav	1	302.8	552.1	467.137	467.187	1260	318	451.77	464.11	BENT	asc	NA	N
GTP	GTP07	GTP07_082017_RPXD0001.wav	2	683.7	850.6	721.048	721.211	1355	327	NA	NA	BENT	desc	NA	N
GTP	GTP07	GTP07_082017_RPXD0001.wav	2	683.7	850.6	784.005	784.038	1420		773.9	783.06	BENT	bot	784.184	N
GTP	GTP07	GTP07_082017_RPXD0001.wav	2	683.7	850.6	784.457	784.486			773.9	783.06	BENT	bot	NA	N
GTP	GTP07	GTP07_082017_RPXD0001.wav	2	683.7	850.6	784.777	784.813	1430		773.9	783.06	BENT	bot	NA	N
GTP	GTP07	GTP07_082017_RPXD0001.wav	2	683.7	850.6	799.979	800.02	1445	1428	NA	NA	BENT	bot	NA	N
GTP	GTP07	GTP07_082017_RPXD0001.wav	2	683.7	850.6	845.401	845.48	1359	350	841.84	843.77	BENT	asc	845.445	N
GTP	GTP07	GTP07_082017_RPXD0002.wav	3	43.7	268.2	143.698	143.817	1242	584	131.5	143.26	BENT	bot	144.378	N
GTP	GTP07	GTP07_082017_RPXD0002.wav	4	398.7	629.7	483.48	483.573	1492	509	479.42	481.54	BENT	bot	NA	N
GTP	GTP07	GTP07_082017_RPXD0002.wav	4	398.7	629.7	506.724	506.79	1390	487	NA	NA	BENT	bot	NA	N
GTP	GTP07	GTP07_082017_RPXD0002.wav	4	398.7	629.7	507.906	507.948	1420	723	NA	NA	BENT	bot	NA	N
GTP	GTP07	GTP07_082017_RPXD0002.wav	4	398.7	629.7	508.61	508.646	1340		NA	NA	BENT	bot	NA	N
GTP	GTP07	GTP07_082017_RPXD0002.wav	4	398.7	629.7	531.739	531.791	1310		518.6	529.5	BENT	bot	NA	N
GTP	GTP07	GTP07_082017_RPXD0002.wav	4	398.7	629.7	534.392	534.421	1370	451	518.6	529.5	BENT	bot	NA	N
GTP	GTP07	GTP07_082017_RPXD0002.wav	4	398.7	629.7	535.401	535.433	1370		518.6	529.5	BENT	bot	NA	N
GTP	GTP07	GTP07_082017_RPXD0004.wav	5	0	259.4	129.215	129.272	1530		NA	NA	PEL	bot	NA	N
GTP	GTP08	GTP08_082017_RPXD0001.wav	1	20.6	225.3	78.9996	79.0318	670	667	77.03	79.28	PEL	desc	NA	N
GTP	GTP08	GTP08_082017_RPXD0001.wav	1	20.6	225.3	79.5915	79.6484	680	373	77.03	79.28	PEL	desc	NA	N
GTP	GTP08	GTP08_082017_RPXD0001.wav	1	20.6	225.3	113.022	113.08			101.07	114.6	PEL	bot	NA	N
GTP	GTP08	GTP08_082017_RPXD0001.wav	1	20.6	225.3	115.074	115.105			101.07	114.6	PEL	bot	NA	N
GTP	GTP08	GTP08_082017_RPXD0001.wav	1	20.6	225.3	115.565	115.614			101.07	114.6	PEL	bot	NA	N
GTP	GTP08	GTP08_082017_RPXD0001.wav	1	20.6	225.3	116.523	116.583			101.07	114.6	PEL	bot	NA	N
GTP	GTP08	GTP08_082017_RPXD0001.wav	1	20.6	225.3	146.043	146.094	700		142.57	145.45	PEL	bot	146.079	N
GTP	GTP08	GTP08_082017_RPXD0001.wav	1	20.6	225.3	170.231	170.285	710		163.44	166.69	PEL	bot	170.27	N
GTP	GTP08	GTP08_082017_RPXD0002.wav	2	211.2	461.5	257.852	257.913	1450	362	NA	NA	BENT	desc	NA	N
GTP	GTP08	GTP08_082017_RPXD0002.wav	2	211.2	461.5	261.012	261.053			NA	NA	BENT	desc	NA	N
GTP	GTP08	GTP08_082017_RPXD0002.wav	2	211.2	461.5	266.256	266.355			NA	NA	BENT	desc	NA	N
GTP	GTP08	GTP08_082017_RPXD0002.wav	2	211.2	461.5	266.874	266.915	750	777	NA	NA	BENT	desc	NA	N
GTP	GTP08	GTP08_082017_RPXD0002.wav	2	211.2	461.5	268.847	268.872	750	748	NA	NA	BENT	desc	NA	N
GTP	GTP08	GTP08_082017_RPXD0002.wav	2	211.2	461.5	269.773	269.868	757	760	NA	NA	BENT	desc	NA	N
GTP	GTP08	GTP08_082017_RPXD0002.wav	2	211.2	461.5	272.034	272.215	738	413	NA	NA	BENT	bot	NA	N
GTP	GTP08	GTP08_082017_RPXD0002.wav	2	211.2	461.5	272.553	272.724			NA	NA	BENT	bot	NA	N
GTP	GTP08	GTP08_082017_RPXD0002.wav	2	211.2	461.5	273.072	273.141	726	720	NA	NA	BENT	bot	NA	N
GTP	GTP08	GTP08_082017_RPXD0002.wav	2	211.2	461.5	273.502	273.61	781	763	NA	NA	BENT	bot	NA	N
GTP	GTP08	GTP08_082017_RPXD0002.wav	2	211.2	461.5	274.407	274.504	757	768	NA	NA	BENT	bot	NA	N
GTP	GTP08	GTP08_082017_RPXD0002.wav	2	211.2	461.5	275.425	275.504	718	690	NA	NA	BENT	bot	NA	N
GTP	GTP08	GTP08_082017_RPXD0002.wav	2	211.2	461.5	276.278	276.434	687	664	NA	NA	BENT	bot	NA	N
GTP	GTP08	GTP08_082017_RPXD0002.wav	2	211.2	461.5	279.897	279.997	710		NA	NA	BENT	bot	NA	N
GTP	GTP08	GTP08_082017_RPXD0002.wav	2	211.2	461.5	379.401	379.477	773		NA	NA	BENT	bot	NA	N
GTP	GTP08	GTP08_082017_RPXD0002.wav	3	692.6	853.6	737.359	737.395	1260	139	NA	NA	BENT	desc	NA	N
GTP	GTP08	GTP08_082017_RPXD0002.wav	3	692.6	853.6	737.753	737.799	870		NA	NA	BENT	desc	NA	N
GTP	GTP08	GTP08_082017_RPXD0002.wav	3	692.6	853.6	738.126	738.178			NA	NA	BENT	desc	NA	N
GTP	GTP08	GTP08_082017_RPXD0002.wav	3	692.6	853.6	740.348	740.379	1870		NA	NA	BENT	desc	NA	N
GTP	GTP08	GTP08_082017_RPXD0002.wav	3	692.6	853.6	741.215	741.342	1875	261	NA	NA	BENT	desc	NA	N
GTP	GTP08	GTP08_082017_RPXD0002.wav	3	692.6	853.6	742.139	742.274	2011	268	NA	NA	BENT	desc	NA	N
GTP	GTP08	GTP08_082017_RPXD0002.wav	3	692.6	853.6	743.032	743.067			NA	NA	BENT	desc	NA	N
GTP	GTP08	GTP08_082017_RPXD0002.wav	3	692.6	853.6	746.6	746.632	1320	327	NA	NA	BENT	desc	NA	N
GTP	GTP08	GTP08_082017_RPXD0002.wav	3	692.6	853.6	747.407	747.445			NA	NA	BENT	desc	NA	N
GTP	GTP08	GTP08_082017_RPXD0002.wav	3	692.6	853.6	748.405	748.441	900		NA	NA	BENT	desc	NA	N
GTP	GTP08	GTP08_082017_RPXD0002.wav	3	692.6	853.6	749.745	749.796			NA	NA	BENT	desc	NA	N
GTP	GTP08	GTP08_082017_RPXD0002.wav	3	692.6	853.6	758.518	758.609			755.79	758.45	BENT	desc	NA	N
GTP	GTP08	GTP08_082017_RPXD0002.wav	3	692.6	853.6	760.656	760.761	804	778	755.79	758.45	BENT	bot	NA	N
GTP	GTP08	GTP08_082017_RPXD0002.wav	3	692.6	853.6	777.214	777.258	900	477	766.37	775.39	BENT	bot	NA	N
GTP	GTP08	GTP08_082017_RPXD0002.wav	3	692.6	853.6	777.33	777.349	870	390	766.37	775.39	BENT	bot	NA	N
GTP	GTP08	GTP08_082017_RPXD0002.wav	3	692.6	853.6	792.258	792.368	867	391	790.14	791.81	BENT	bot	NA	N
GTP	GTP08	GTP08_082017_RPXD0002.wav	3	692.6	853.6	820.002	820.038	890	413	NA	NA	BENT	bot	NA	N
GTP	GTP08	GTP08_082017_RPXD0002.wav	3	692.6	853.6	825.159	825.24			NA	NA	BENT	bot	NA	N
GTP	GTP08	GTP08_082017_RPXD0002.wav	3	692.6	853.6	825.583	825.643	980		NA	NA	BENT	bot	NA	N
GTP	GTP08	GTP08_082017_RPXD0002.wav	3	692.6	853.6	842.861	842.901	900	478	NA	NA	BENT	bot	NA	N
GTP	GTP08	GTP08_082017_RPXD0002.wav	3	692.6	853.6	843.483	843.519	1060	530	NA	NA	BENT	bot	NA	N
GTP	GTP08	GTP08_082017_RPXD0002.wav	3	692.6	853.6	845.571	845.615	890	305	844.33	845.36	BENT	bot	NA	N
GTP	GTP08	GTP08_082017_RPXD0002.wav	3	692.6	853.6	846.189	846.257	906	379	844.33	845.36	BENT	bot	NA	N
GTP	GTP08	GTP08_082017_RPXD0002.wav	3	692.6	853.6	852.899	852.942			NA	NA	BENT	bot	NA	N
GTP	GTP08	GTP08_082017_RPXD0003.wav	4	0	67.43	5.1235	5.1703	780		0	3.75	BENT	bot	NA	N
GTP	GTP08	GTP08_082017_RPXD0003.wav	4	0	67.43	12.745	12.7795	850	445	NA	NA	BENT	bot	NA	N
GTP	GTP08	GTP08_082017_RPXD0003.wav	4	0	67.43	16.0104	16.0621			NA	NA	BENT	bot	NA	N
GTP	GTP08	GTP08_082017_RPXD0003.wav	5	222.3	455.1	274.264	274.366			NA	NA	BENT	desc	NA	N
GTP	GTP08	GTP08_082017_RPXD0003.wav	5	222.3	455.1	275.17	275.271	765		NA	NA	BENT	desc	NA	N
GTP	GTP08	GTP08_082017_RPXD0003.wav	5	222.3	455.1	275.583	275.658			NA	NA	BENT	desc	NA	N
GTP	GTP08	GTP08_082017_RPXD0003.wav	5	222.3	455.1	276.105	276.2			NA	NA	BENT	desc	NA	N
GTP	GTP08	GTP08_082017_RPXD0003.wav	5	222.3	455.1	281.668	281.776			NA	NA	BENT	desc	NA	N
GTP	GTP08	GTP08_082017_RPXD0003.wav	5	222.3	455.1	282.604	282.701	789		NA	NA	BENT	desc	NA	N
GTP	GTP08	GTP08_082017_RPXD0003.wav	5	222.3	455.1	282.985	283.117	765		NA	NA	BENT	desc	NA	N
GTP	GTP08	GTP08_082017_RPXD0003.wav	5	222.3	455.1	283.514	283.592	804		NA	NA	BENT	desc	NA	N
GTP	GTP08	GTP08_082017_RPXD0003.wav	5	222.3	455.1	283.868	283.928			NA	NA	BENT	desc	NA	N
GTP	GTP08	GTP08_082017_RPXD0003.wav	5	222.3	455.1	284.381	284.43	760		NA	NA	BENT	desc	NA	N
GTP	GTP08	GTP08_082017_RPXD0003.wav	5	222.3	455.1	284.676	284.783			NA	NA	BENT	desc	NA	N
GTP	GTP08	GTP08_082017_RPXD0003.wav	5	222.3	455.1	285.495	285.563			NA	NA	BENT	desc	NA	N
GTP	GTP08	GTP08_082017_RPXD0003.wav	5	222.3	455.1	290.266	290.316	780	382	NA	NA	BENT	bot	NA	N
GTP	GTP08	GTP08_082017_RPXD0003.wav	5	222.3	455.1	292.243	292.313	781	332	NA	NA	BENT	bot	NA	N
GTP	GTP08	GTP08_082017_RPXD0003.wav	5	222.3	455.1	293.966	294	840		NA	NA	BENT	bot	NA	N
GTP	GTP08	GTP08_082017_RPXD0003.wav	5	222.3	455.1	293.961	294.02			NA	NA	BENT	bot	NA	N
GTP	GTP08	GTP08_082017_RPXD0003.wav	5	222.3	455.1	297.261	297.312			NA	NA	BENT	bot	NA	N
GTP	GTP08	GTP08_082017_RPXD0003.wav	5	222.3	455.1	313.861	313.914			300.85	312.86	BENT	bot	NA	N
GTP	GTP08	GTP08_082017_RPXD0003.wav	5	222.3	455.1	316.744	316.772	750	331	300.85	312.86	BENT	bot	NA	N
GTP	GTP08	GTP08_082017_RPXD0003.wav	5	222.3	455.1	332.081	332.148	804	819	321.05	329.77	BENT	bot	332.199	N
GTP	GTP08	GTP08_082017_RPXD0003.wav	5	222.3	455.1	335.417	335.445			333.15	334.09	BENT	bot	NA	N
GTP	GTP08	GTP08_082017_RPXD0003.wav	5	222.3	455.1	347.012	347.07	1350	423	337.28	345.96	BENT	bot	NA	N
GTP	GTP08	GTP08_082017_RPXD0003.wav	5	222.3	455.1	352.525	352.586			347.6	348.54	BENT	bot	NA	N
GTP	GTP08	GTP08_082017_RPXD0003.wav	5	222.3	455.1	354.884	354.926			347.6	348.54	BENT	bot	NA	N
GTP	GTP08	GTP08_082017_RPXD0003.wav	5	222.3	455.1	364.046	364.215			NA	NA	BENT	bot	NA	N
GTP	GTP08	GTP08_082017_RPXD0003.wav	5	222.3	455.1	365.803	365.926	843	285	NA	NA	BENT	bot	NA	N
GTP	GTP08	GTP08_082017_RPXD0003.wav	5	222.3	455.1	370.403	370.515	726	357	NA	NA	BENT	bot	NA	N
GTP	GTP08	GTP08_082017_RPXD0003.wav	5	222.3	455.1	372.568	372.624	1700	564	NA	NA	BENT	bot	NA	N
GTP	GTP08	GTP08_082017_RPXD0003.wav	5	222.3	455.1	384.829	384.88	790	140	374.04	383.92	BENT	bot	NA	N
GTP	GTP08	GTP08_082017_RPXD0003.wav	5	222.3	455.1	388.618	388.67			374.04	383.92	BENT	bot	NA	N
GTP	GTP08	GTP08_082017_RPXD0003.wav	5	222.3	455.1	389.816	389.865	780	385	374.04	383.92	BENT	bot	NA	N
GTP	GTP08	GTP08_082017_RPXD0003.wav	5	222.3	455.1	390.959	391.011	780		374.04	383.92	BENT	bot	NA	N
GTP	GTP08	GTP08_082017_RPXD0003.wav	5	222.3	455.1	447.45	447.779	625	204	NA	NA	BENT	asc	NA	N
GTP	GTP08	GTP08_082017_RPXD0003.wav	6	739.94	853.72	792.837	792.9	1840	368	NA	NA	BENT	desc	NA	N
GTP	GTP08	GTP08_082017_RPXD0003.wav	6	739.94	853.72	795.013	795.048	750	780	NA	NA	BENT	desc	795.062	N
GTP	GTP08	GTP08_082017_RPXD0003.wav	6	739.94	853.72	850.198	850.287	835	378	846.84	848.2	BENT	bot	NA	N
GTP	GTP08	GTP08_082017_RPXD0003.wav	6	739.94	853.72	850.96	851.055			846.84	848.2	BENT	bot	NA	N
GTP	GTP08	GTP08_082017_RPXD0003.wav	6	739.94	853.72	853.236	853.312	843	377	846.84	848.2	BENT	bot	NA	N
GTP	GTP08	GTP08_082017_RPXD0004.wav	7	228.3	488.8	251.573	251.665	812	374	NA	NA	BENT	desc	NA	N
GTP	GTP08	GTP08_082017_RPXD0004.wav	7	228.3	488.8	361.034	361.113			350.28	360.47	BENT	bot	NA	N
GTP	GTP08	GTP08_082017_RPXD0004.wav	7	228.3	488.8	365.583	365.616			350.28	360.47	BENT	bot	NA	N
GTP	GTP08	GTP08_082017_RPXD0004.wav	7	228.3	488.8	371.024	371.091			NA	NA	BENT	bot	NA	N
GTP	GTP08	GTP08_082017_RPXD0004.wav	7	228.3	488.8	374.067	374.107	850	443	NA	NA	BENT	bot	NA	N
GTP	GTP08	GTP08_082017_RPXD0004.wav	7	228.3	488.8	377.598	377.638			375.99	377.29	BENT	bot	NA	N
GTP	GTP08	GTP08_082017_RPXD0004.wav	7	228.3	488.8	390.113	390.147	840	424	389.1	389.91	BENT	bot	NA	N
GTP	GTP08	GTP08_082017_RPXD0004.wav	7	228.3	488.8	479.193	479.329	757	358	NA	NA	BENT	asc	NA	N
GTP	GTP08	GTP08_082017_RPXD0005.wav	8	0	112.59	27.3407	27.379			18.82	25.3	BENT	bot	NA	N
GTP	GTP08	GTP08_082017_RPXD0005.wav	8	0	112.59	31.6858	31.7232	750	434	18.82	25.3	BENT	bot	NA	N
GTP	GTP08	GTP08_082017_RPXD0005.wav	8	0	112.59	32.1526	32.1971	1000	496	18.82	25.3	BENT	bot	NA	N
GTP	GTP08	GTP08_082017_RPXD0005.wav	8	0	112.59	33.6556	33.6986	570	193	18.82	25.3	BENT	bot	NA	N
GTP	GTP08	GTP08_082017_RPXD0005.wav	8	0	112.59	41.3239	41.3796			34.78	36.01	BENT	bot	NA	N
GTP	GTP08	GTP08_082017_RPXD0005.wav	8	0	112.59	42.0078	42.0709	710	331	34.78	36.01	BENT	bot	42.075	N
GTP	GTP08	GTP08_082017_RPXD0005.wav	8	0	112.59	48.776	48.8043			34.78	36.01	BENT	bot	NA	N
GTP	GTP08	GTP08_082017_RPXD0005.wav	8	0	112.59	49.3488	49.3898			34.78	36.01	BENT	bot	49.449	N
GTP	GTP09	GTP09_082017_RPXD0001.wav	1	594.7	744.1	636.193	636.224	1370	1379	632.6	634.81	PEL	bot	NA	N
GTP	GTP09	GTP09_082017_RPXD0002.wav	2	246.1	440.8	350.396	350.466	1726	580	333.6	349.79	PEL	bot	350.937	N
GTP	GTP12	GTP12_092017_RPXD0002.wav	3	79.83	197.34	114.259	114.302	1430	479	NA	NA	PEL	bot	115.711	N
GTP	GTP13	GTP13_092017_RPXD0001.wav	1	10.7	278.3	212.736	212.77	1540	1539	NA	NA	BENT	asc	212.779	N
GTP	GTP13	GTP13_092017_RPXD0001.wav	1	10.7	278.3	215.998	216.049			NA	NA	BENT	asc	216.083	N
GTP	GTP13	GTP13_092017_RPXD0001.wav	1	10.7	278.3	217.409	217.441	1320	1329	NA	NA	BENT	asc	217.484	N
GTP	GTP13	GTP13_092017_RPXD0001.wav	1	10.7	278.3	219.597	219.691	1390	1396	NA	NA	BENT	asc	219.686	N
GTP	GTP13	GTP13_092017_RPXD0001.wav	1	10.7	278.3	220.506	220.552			NA	NA	BENT	asc	220.587	N
GTP	GTP13	GTP13_092017_RPXD0001.wav	1	10.7	278.3	225.286	225.314	1370	1375	NA	NA	BENT	asc	225.317	N
GTP	GTP13	GTP13_092017_RPXD0001.wav	2	591.2	851	743.721	743.771	1890	269	729.97	740.16	BENT	bot	NA	N
GTP	GTP13	GTP13_092017_RPXD0001.wav	2	591.2	851	786.965	787.024			NA	NA	BENT	asc	787.054	N
GTP	GTP13	GTP13_092017_RPXD0004.wav	3	0	116.5	92.6226	92.6445	1370	464	NA	NA	BENT	asc	NA	N
