# Supplementary material for: First evidence of underwater vocalisations in hunting penguins
Source: PeerJ. 2019 Dec 18;7:e8240. doi: 10.7717/peerj.8240 (PMC6966993; doi:10.7717/peerj.8240)
Supplement: Supplemental Information 3 [file peerj-07-8240-s003.xlsx]

## Sheet: Sheet1
Species	IndividualID	Video	DiveID	DiveType	DivePhase	CaptType	CaptTime	Call	PreyType	start dive	capt_pos
GTP	GTP02	RPXD0005	1	PEL	bot	PEL	90.686	no	krill	66.601	1
GTP	GTP02	RPXD0005	1	PEL	bot	PEL	95.692	no	krill	66.601	2
GTP	GTP02	RPXD0005	1	PEL	bot	PEL	109.456	no	krill	66.601	3
GTP	GTP02	RPXD0005	1	PEL	bot	PEL	109.576	no	krill	66.601	4
GTP	GTP02	RPXD0005	1	PEL	bot	PEL	110.206	no	krill	66.601	5
GTP	GTP02	RPXD0005	1	PEL	bot	PEL	111.457	no	krill	66.601	6
GTP	GTP02	RPXD0005	1	PEL	bot	PEL	111.957	no	krill	66.601	7
GTP	GTP02	RPXD0005	1	PEL	bot	PEL	112.707	no	krill	66.601	8
GTP	GTP02	RPXD0005	1	PEL	bot	PEL	113.207	no	krill	66.601	9
GTP	GTP02	RPXD0005	1	PEL	bot	PEL	115.748	no	krill	66.601	10
GTP	GTP02	RPXD0005	1	PEL	bot	PEL	118.457	no	krill	66.601	11
GTP	GTP02	RPXD0005	1	PEL	bot	PEL	126.957	no	krill	66.601	12
GTP	GTP02	RPXD0005	1	PEL	bot	PEL	127.246	no	krill	66.601	13
GTP	GTP02	RPXD0005	1	PEL	bot	PEL	127.722	no	krill	66.601	14
GTP	GTP02	RPXD0005	1	PEL	bot	PEL	129.472	no	krill	66.601	15
GTP	GTP02	RPXD0005	1	PEL	bot	PEL	130.225	no	krill	66.601	16
GTP	GTP02	RPXD0005	1	PEL	bot	PEL	131.975	no	krill	66.601	17
GTP	GTP02	RPXD0005	1	PEL	bot	PEL	132.475	no	krill	66.601	18
GTP	GTP02	RPXD0005	1	PEL	bot	PEL	133.228	no	krill	66.601	19
GTP	GTP02	RPXD0005	1	PEL	bot	PEL	137.481	no	krill	66.601	20
GTP	GTP02	RPXD0005	1	PEL	bot	PEL	137.981	no	krill	66.601	21
GTP	GTP02	RPXD0005	1	PEL	bot	PEL	138.521	no	krill	66.601	22
GTP	GTP02	RPXD0005	1	PEL	bot	PEL	139.731	no	krill	66.601	23
GTP	GTP02	RPXD0005	1	PEL	bot	PEL	140.731	no	krill	66.601	24
GTP	GTP02	RPXD0005	1	PEL	bot	PEL	141.735	no	krill	66.601	25
GTP	GTP02	RPXD0005	1	PEL	bot	PEL	143.735	no	krill	66.601	26
GTP	GTP02	RPXD0005	1	PEL	bot	PEL	148.485	no	krill	66.601	27
GTP	GTP02	RPXD0005	1	PEL	bot	PEL	149.485	no	krill	66.601	28
GTP	GTP02	RPXD0005	1	PEL	bot	PEL	153.996	no	krill	66.601	29
GTP	GTP02	RPXD0005	1	PEL	bot	PEL	154.746	no	krill	66.601	30
GTP	GTP02	RPXD0005	1	PEL	bot	PEL	159.496	no	krill	66.601	31
GTP	GTP02	RPXD0005	1	PEL	bot	PEL	160.246	no	krill	66.601	32
GTP	GTP02	RPXD0005	1	PEL	bot	PEL	161.746	no	krill	66.601	33
GTP	GTP02	RPXD0005	1	PEL	bot	PEL	162.996	no	krill	66.601	34
GTP	GTP02	RPXD0005	1	PEL	bot	PEL	163.497	no	krill	66.601	35
GTP	GTP02	RPXD0005	1	PEL	bot	PEL	173.297	no	krill	66.601	36
GTP	GTP02	RPXD0005	1	PEL	bot	PEL	180.269	no	krill	66.601	37
GTP	GTP02	RPXD0005	1	PEL	bot	PEL	182.019	no	krill	66.601	38
GTP	GTP02	RPXD0005	1	PEL	bot	PEL	183.769	no	krill	66.601	39
GTP	GTP02	RPXD0005	1	PEL	bot	PEL	184.269	no	krill	66.601	40
GTP	GTP02	RPXD0005	1	PEL	bot	PEL	185.019	no	krill	66.601	41
GTP	GTP02	RPXD0005	1	PEL	bot	PEL	187.029	no	krill	66.601	42
GTP	GTP02	RPXD0005	1	PEL	bot	PEL	187.279	no	krill	66.601	43
GTP	GTP02	RPXD0005	1	PEL	bot	PEL	191.779	no	krill	66.601	44
GTP	GTP02	RPXD0005	1	PEL	bot	PEL	198.529	no	krill	66.601	45
GTP	GTP02	RPXD0005	1	PEL	bot	PEL	202.295	no	krill	66.601	46
GTP	GTP02	RPXD0005	1	PEL	bot	PEL	210.045	no	krill	66.601	47
GTP	GTP02	RPXD0005	1	PEL	bot	PEL	210.545	no	krill	66.601	48
GTP	GTP02	RPXD0005	1	PEL	bot	PEL	211.045	no	krill	66.601	49
GTP	GTP02	RPXD0005	1	PEL	bot	PEL	213.545	no	krill	66.601	50
GTP	GTP02	RPXD0005	1	PEL	bot	PEL	214.045	no	krill	66.601	51
GTP	GTP02	RPXD0005	1	PEL	bot	PEL	215.045	no	krill	66.601	52
GTP	GTP02	RPXD0005	1	PEL	bot	PEL	215.545	no	krill	66.601	53
GTP	GTP02	RPXD0005	1	PEL	bot	PEL	221.563	no	krill	66.601	54
GTP	GTP02	RPXD0005	1	PEL	bot	PEL	222.063	no	krill	66.601	55
GTP	GTP02	RPXD0005	1	PEL	bot	PEL	222.814	no	krill	66.601	56
GTP	GTP02	RPXD0005	1	PEL	bot	PEL	223.313	no	krill	66.601	57
GTP	GTP02	RPXD0005	1	PEL	bot	PEL	228.063	no	krill	66.601	58
GTP	GTP02	RPXD0005	1	PEL	bot	PEL	228.32	no	krill	66.601	59
GTP	GTP02	RPXD0005	1	PEL	bot	PEL	228.57	no	krill	66.601	60
GTP	GTP02	RPXD0005	1	PEL	bot	PEL	229.32	no	krill	66.601	61
GTP	GTP02	RPXD0005	1	PEL	bot	PEL	230.32	no	krill	66.601	62
GTP	GTP02	RPXD0005	1	PEL	bot	PEL	232.07	no	krill	66.601	63
GTP	GTP02	RPXD0005	1	PEL	bot	PEL	236.07	no	krill	66.601	64
GTP	GTP02	RPXD0005	1	PEL	bot	PEL	236.82	no	krill	66.601	65
GTP	GTP02	RPXD0005	1	PEL	bot	PEL	238.07	no	krill	66.601	66
GTP	GTP02	RPXD0005	1	PEL	bot	PEL	239.08	no	krill	66.601	67
GTP	GTP02	RPXD0005	1	PEL	bot	PEL	239.84	no	krill	66.601	68
GTP	GTP02	RPXD0005	1	PEL	bot	PEL	240.081	no	krill	66.601	69
GTP	GTP02	RPXD0006	2	PEL	bot	PEL	110.852	no	krill	77.351	1
GTP	GTP02	RPXD0006	2	PEL	bot	PEL	111.912	no	krill	77.351	2
GTP	GTP02	RPXD0006	2	PEL	bot	PEL	113.459	no	krill	77.351	3
GTP	GTP02	RPXD0006	2	PEL	bot	PEL	115.209	no	krill	77.351	4
GTP	GTP02	RPXD0006	2	PEL	bot	PEL	115.712	no	krill	77.351	5
GTP	GTP02	RPXD0006	2	PEL	bot	PEL	117.461	no	krill	77.351	6
GTP	GTP02	RPXD0006	2	PEL	bot	PEL	118.213	no	krill	77.351	7
GTP	GTP02	RPXD0006	2	PEL	bot	PEL	119.461	no	krill	77.351	8
GTP	GTP02	RPXD0006	2	PEL	bot	PEL	120.212	no	krill	77.351	9
GTP	GTP02	RPXD0006	2	PEL	bot	PEL	124.212	no	krill	77.351	10
GTP	GTP02	RPXD0006	2	PEL	bot	PEL	142.962	no	krill	77.351	11
GTP	GTP02	RPXD0006	2	PEL	bot	PEL	143.711	no	krill	77.351	12
GTP	GTP02	RPXD0006	2	PEL	bot	PEL	144.212	no	krill	77.351	13
GTP	GTP02	RPXD0006	2	PEL	bot	PEL	144.712	no	krill	77.351	14
GTP	GTP02	RPXD0006	2	PEL	bot	PEL	145.812	no	krill	77.351	15
GTP	GTP02	RPXD0006	2	PEL	bot	PEL	145.991	no	krill	77.351	16
GTP	GTP02	RPXD0006	2	PEL	bot	PEL	148.493	no	krill	77.351	17
GTP	GTP02	RPXD0006	2	PEL	bot	PEL	150.495	no	krill	77.351	18
GTP	GTP02	RPXD0006	2	PEL	bot	PEL	151.995	no	krill	77.351	19
GTP	GTP02	RPXD0006	2	PEL	bot	PEL	152.495	no	krill	77.351	20
GTP	GTP02	RPXD0006	2	PEL	bot	PEL	153.495	no	krill	77.351	21
GTP	GTP02	RPXD0006	2	PEL	bot	PEL	155.999	no	krill	77.351	22
GTP	GTP02	RPXD0006	2	PEL	bot	PEL	182.95	no	U	77.351	23
GTP	GTP04	RPXD0002	1	BENT	asc	PEL	132.232	no	krill	NA	NA
GTP	GTP04	RPXD0002	2	BENT	asc	PEL	134.835	no	U	NA	NA
GTP	GTP04	RPXD0002	2	BENT	bot	BENT	442.777	no	fish	293.257	NA
GTP	GTP05	RPXD0002	1	BENT	asc	PEL	10.01	yes	U	NA	NA
GTP	GTP05	RPXD0002	1	BENT	asc	PEL	46.68	no	U	NA	NA
GTP	GTP05	RPXD0004	4	BENT	asc	PEL	473.674	no	fish	366.851	NA
GTP	GTP05	RPXD0004	4	BENT	asc	PEL	478.104	no	fish	366.851	NA
GTP	GTP05	RPXD0004	4	BENT	asc	PEL	479.061	no	fish	366.851	NA
GTP	GTP05	RPXD0004	4	BENT	asc	PEL	481.248	no	fish	366.851	NA
GTP	GTP05	RPXD0004	4	BENT	asc	PEL	483.315	no	fish	366.851	NA
GTP	GTP05	RPXD0004	4	BENT	asc	PEL	487.02	no	fish	366.851	NA
GTP	GTP05	RPXD0004	4	BENT	asc	PEL	488.321	no	fish	366.851	NA
GTP	GTP05	RPXD0004	4	BENT	asc	PEL	497.331	no	fish	366.851	NA
GTP	GTP05	RPXD0004	4	BENT	asc	PEL	504.331	no	fish	366.851	NA
GTP	GTP06	RPXD0002	1	PEL	desc	PEL	640.378	no	U	617.855	1
GTP	GTP06	RPXD0002	1	PEL	bot	PEL	657.735	no	krill	617.855	2
GTP	GTP06	RPXD0002	1	PEL	bot	PEL	658.485	no	krill	617.855	3
GTP	GTP06	RPXD0002	1	PEL	bot	PEL	659.485	no	krill	617.855	4
GTP	GTP06	RPXD0002	1	PEL	bot	PEL	660.235	no	krill	617.855	5
GTP	GTP06	RPXD0002	1	PEL	bot	PEL	660.735	no	krill	617.855	6
GTP	GTP06	RPXD0002	1	PEL	bot	PEL	729.054	no	krill	617.855	7
GTP	GTP06	RPXD0002	1	PEL	bot	PEL	748.573	no	krill	617.855	8
GTP	GTP06	RPXD0002	1	PEL	bot	PEL	750.073	no	krill	617.855	9
GTP	GTP06	RPXD0002	1	PEL	bot	PEL	756.823	no	krill	617.855	10
GTP	GTP06	RPXD0002	1	PEL	bot	PEL	763.587	no	krill	617.855	11
GTP	GTP06	RPXD0002	1	PEL	bot	PEL	771.087	no	krill	617.855	12
GTP	GTP06	RPXD0002	1	PEL	bot	PEL	772.837	no	krill	617.855	13
GTP	GTP06	RPXD0002	1	PEL	bot	PEL	774.337	no	krill	617.855	14
GTP	GTP06	RPXD0002	1	PEL	bot	PEL	784.608	no	krill	617.855	15
GTP	GTP06	RPXD0002	1	PEL	bot	PEL	790.113	no	krill	617.855	16
GTP	GTP06	RPXD0002	1	PEL	bot	PEL	790.363	no	krill	617.855	17
GTP	GTP06	RPXD0002	1	PEL	bot	PEL	794.113	no	krill	617.855	18
GTP	GTP06	RPXD0002	1	PEL	bot	PEL	802.625	no	krill	617.855	19
GTP	GTP06	RPXD0003	2	BENT	bot	BENT	198.699	no	U	21.6	NA
GTP	GTP06	RPXD0003	2	BENT	asc	PEL	231.598	no	krill	21.6	NA
GTP	GTP06	RPXD0003	2	BENT	asc	PEL	234.334	no	krill	21.6	NA
GTP	GTP06	RPXD0004	3	BENT	bot	BENT	57.591	no	fish	NA	NA
GTP	GTP06	RPXD0004	3	BENT	asc	PEL	89.923	no	U	NA	NA
GTP	GTP06	RPXD0005	4	BENT	desc	PEL	79.046	no	U	49.146	1
GTP	GTP06	RPXD0005	4	BENT	bot	BENT	113.313	no	U	49.146	NA
GTP	GTP06	RPXD0005	4	BENT	bot	BENT	146.98	no	U	49.146	NA
GTP	GTP06	RPXD0005	4	BENT	bot	BENT	156.657	no	fish	49.146	NA
GTP	GTP06	RPXD0005	4	BENT	bot	BENT	167.034	no	U	49.146	NA
GTP	GTP06	RPXD0005	4	BENT	bot	BENT	178.946	no	U	49.146	NA
GTP	GTP06	RPXD0006	5	BENT	desc	PEL	78.345	no	U	54.102	1
GTP	GTP06	RPXD0006	5	BENT	desc	PEL	80.08	no	U	54.102	2
GTP	GTP06	RPXD0006	5	BENT	desc	PEL	103.37	no	U	54.102	3
GTP	GTP06	RPXD0006	5	BENT	bot	BENT	120.387	no	fish	54.102	NA
GTP	GTP06	RPXD0006	5	BENT	bot	BENT	140.073	no	U	54.102	NA
GTP	GTP07	RPXD0001	1	BENT	bot	BENT	430.097	yes	U	302.892	NA
GTP	GTP07	RPXD0001	1	BENT	asc	PEL	507.839	no	krill	302.892	NA
GTP	GTP07	RPXD0001	2	BENT	bot	BENT	784.184	yes	U	683.587	NA
GTP	GTP07	RPXD0001	2	BENT	asc	PEL	845.445	yes	fish	683.587	NA
GTP	GTP07	RPXD0001	2	BENT	asc	PEL	847.281	no	fish	683.587	NA
GTP	GTP07	RPXD0002	3	BENT	bot	BENT	144.378	yes	fish	43.602	NA
GTP	GTP08	RPXD0001	1	PEL	bot	PEL	99.032	no	U	19.617	1
GTP	GTP08	RPXD0001	1	PEL	bot	PEL	146.079	yes	krill	19.617	2
GTP	GTP08	RPXD0001	1	PEL	bot	PEL	159.826	no	krill	19.617	3
GTP	GTP08	RPXD0001	1	PEL	bot	PEL	169.514	no	krill	19.617	4
GTP	GTP08	RPXD0001	1	PEL	bot	PEL	170.27	yes	krill	19.617	5
GTP	GTP08	RPXD0001	1	PEL	bot	PEL	172.139	no	krill	19.617	6
GTP	GTP08	RPXD0001	1	PEL	bot	PEL	172.573	no	krill	19.617	7
GTP	GTP08	RPXD0001	1	PEL	bot	PEL	182.716	no	krill	19.617	8
GTP	GTP08	RPXD0002	2	BENT	asc	PEL	415.516	no	U	211.053	NA
GTP	GTP08	RPXD0003	5	BENT	bot	BENT	332.199	yes	U	222.35	NA
GTP	GTP08	RPXD0003	5	BENT	asc	PEL	405.439	no	fish	222.35	NA
GTP	GTP08	RPXD0003	6	BENT	desc	PEL	795.062	yes	fish	739.992	1
GTP	GTP08	RPXD0004	7	BENT	bot	BENT	393.694	no	fish	228.853	NA
GTP	GTP08	RPXD0004	7	BENT	asc	PEL	429.515	no	fish	228.853	NA
GTP	GTP08	RPXD0005	8	BENT	bot	BENT	42.075	yes	U	NA	NA
GTP	GTP08	RPXD0005	8	BENT	bot	BENT	49.449	yes	U	NA	NA
GTP	GTP08	RPXD0005	8	BENT	asc	PEL	64.662	no	krill	NA	NA
GTP	GTP08	RPXD0005	8	BENT	asc	PEL	73.67	no	U	NA	NA
GTP	GTP09	RPXD0002	2	PEL	bot	PEL	296.864	no	krill	246.602	1
GTP	GTP09	RPXD0002	2	PEL	bot	PEL	301.892	no	krill	246.602	2
GTP	GTP09	RPXD0002	2	PEL	bot	PEL	302.392	no	krill	246.602	3
GTP	GTP09	RPXD0002	2	PEL	bot	PEL	303.393	no	krill	246.602	4
GTP	GTP09	RPXD0002	2	PEL	bot	PEL	304.143	no	krill	246.602	5
GTP	GTP09	RPXD0002	2	PEL	bot	PEL	304.894	no	krill	246.602	6
GTP	GTP09	RPXD0002	2	PEL	bot	PEL	307.146	no	krill	246.602	7
GTP	GTP09	RPXD0002	2	PEL	bot	PEL	312.152	no	krill	246.602	8
GTP	GTP09	RPXD0002	2	PEL	bot	PEL	312.402	no	krill	246.602	9
GTP	GTP09	RPXD0002	2	PEL	bot	PEL	314.902	no	krill	246.602	10
GTP	GTP09	RPXD0002	2	PEL	bot	PEL	315.152	no	krill	246.602	11
GTP	GTP09	RPXD0002	2	PEL	bot	PEL	315.652	no	krill	246.602	12
GTP	GTP09	RPXD0002	2	PEL	bot	PEL	324.663	no	krill	246.602	13
GTP	GTP09	RPXD0002	2	PEL	bot	PEL	328.413	no	krill	246.602	14
GTP	GTP09	RPXD0002	2	PEL	bot	PEL	350.937	yes	krill	246.602	15
GTP	GTP09	RPXD0002	2	PEL	bot	PEL	358.446	no	krill	246.602	16
GTP	GTP09	RPXD0002	2	PEL	bot	PEL	367.204	no	krill	246.602	17
GTP	GTP09	RPXD0002	2	PEL	bot	PEL	368.204	no	krill	246.602	18
GTP	GTP09	RPXD0002	2	PEL	bot	PEL	378.715	no	krill	246.602	19
GTP	GTP09	RPXD0002	2	PEL	bot	PEL	379.081	no	krill	246.602	20
GTP	GTP09	RPXD0002	2	PEL	bot	PEL	381.218	no	krill	246.602	21
GTP	GTP09	RPXD0002	3	PEL	bot	PEL	767.591	no	krill	694.468	1
GTP	GTP09	RPXD0002	3	PEL	bot	PEL	769.593	no	krill	694.468	2
GTP	GTP09	RPXD0002	3	PEL	bot	PEL	774.598	no	krill	694.468	3
GTP	GTP09	RPXD0002	3	PEL	bot	PEL	776.35	no	krill	694.468	4
GTP	GTP09	RPXD0002	3	PEL	bot	PEL	778.852	no	krill	694.468	5
GTP	GTP09	RPXD0002	3	PEL	bot	PEL	779.602	no	krill	694.468	6
GTP	GTP09	RPXD0005	4	PEL	bot	PEL	5.105	no	krill	NA	NA
GTP	GTP09	RPXD0005	4	PEL	bot	PEL	7.106	no	krill	NA	NA
GTP	GTP09	RPXD0005	4	PEL	bot	PEL	7.606	no	krill	NA	NA
GTP	GTP09	RPXD0005	4	PEL	bot	PEL	8.108	no	krill	NA	NA
GTP	GTP09	RPXD0005	4	PEL	bot	PEL	8.606	no	krill	NA	NA
GTP	GTP09	RPXD0005	4	PEL	bot	PEL	10.356	no	krill	NA	NA
GTP	GTP09	RPXD0005	4	PEL	bot	PEL	14.856	no	krill	NA	NA
GTP	GTP09	RPXD0005	4	PEL	bot	PEL	16.366	no	krill	NA	NA
GTP	GTP09	RPXD0005	4	PEL	bot	PEL	18.116	no	krill	NA	NA
GTP	GTP09	RPXD0005	4	PEL	bot	PEL	18.866	no	krill	NA	NA
GTP	GTP09	RPXD0005	4	PEL	bot	PEL	20.366	no	krill	NA	NA
GTP	GTP09	RPXD0005	4	PEL	bot	PEL	23.616	no	krill	NA	NA
GTP	GTP09	RPXD0005	4	PEL	bot	PEL	25.616	no	krill	NA	NA
GTP	GTP09	RPXD0005	4	PEL	bot	PEL	26.366	no	krill	NA	NA
GTP	GTP09	RPXD0005	4	PEL	bot	PEL	27.116	no	krill	NA	NA
GTP	GTP09	RPXD0005	4	PEL	bot	PEL	29.877	no	krill	NA	NA
GTP	GTP09	RPXD0005	4	PEL	bot	PEL	33.382	no	krill	NA	NA
GTP	GTP09	RPXD0005	4	PEL	bot	PEL	34.632	no	krill	NA	NA
GTP	GTP09	RPXD0005	4	PEL	bot	PEL	35.662	no	krill	NA	NA
GTP	GTP09	RPXD0005	4	PEL	bot	PEL	36.382	no	krill	NA	NA
GTP	GTP09	RPXD0005	4	PEL	bot	PEL	36.882	no	krill	NA	NA
GTP	GTP09	RPXD0005	4	PEL	bot	PEL	37.382	no	krill	NA	NA
GTP	GTP09	RPXD0005	4	PEL	bot	PEL	40.382	no	krill	NA	NA
GTP	GTP09	RPXD0005	4	PEL	bot	PEL	41.132	no	krill	NA	NA
GTP	GTP09	RPXD0005	4	PEL	bot	PEL	41.632	no	krill	NA	NA
GTP	GTP09	RPXD0005	4	PEL	bot	PEL	42.132	no	krill	NA	NA
GTP	GTP09	RPXD0005	4	PEL	bot	PEL	42.882	no	krill	NA	NA
GTP	GTP09	RPXD0005	4	PEL	bot	PEL	43.132	no	krill	NA	NA
GTP	GTP09	RPXD0005	4	PEL	bot	PEL	48.132	no	krill	NA	NA
GTP	GTP09	RPXD0005	4	PEL	bot	PEL	51.132	no	krill	NA	NA
GTP	GTP09	RPXD0005	4	PEL	bot	PEL	52.65	no	krill	NA	NA
GTP	GTP09	RPXD0005	4	PEL	bot	PEL	53.65	no	krill	NA	NA
GTP	GTP09	RPXD0005	4	PEL	bot	PEL	56.4	no	krill	NA	NA
GTP	GTP09	RPXD0005	4	PEL	bot	PEL	57.65	no	krill	NA	NA
GTP	GTP09	RPXD0005	4	PEL	bot	PEL	58.15	no	krill	NA	NA
GTP	GTP09	RPXD0005	4	PEL	bot	PEL	64.4	no	krill	NA	NA
GTP	GTP09	RPXD0005	4	PEL	bot	PEL	64.65	no	krill	NA	NA
GTP	GTP09	RPXD0005	4	PEL	bot	PEL	67.664	no	krill	NA	NA
GTP	GTP09	RPXD0005	4	PEL	bot	PEL	68.664	no	krill	NA	NA
GTP	GTP09	RPXD0005	4	PEL	bot	PEL	73.167	no	krill	NA	NA
GTP	GTP09	RPXD0005	5	PEL	bot	PEL	162.003	no	krill	141.67	1
GTP	GTP09	RPXD0005	5	PEL	bot	PEL	162.753	no	krill	141.67	2
GTP	GTP09	RPXD0005	5	PEL	bot	PEL	163.257	no	krill	141.67	3
GTP	GTP09	RPXD0005	5	PEL	bot	PEL	165.507	no	krill	141.67	4
GTP	GTP09	RPXD0005	5	PEL	bot	PEL	167.762	no	krill	141.67	5
GTP	GTP09	RPXD0005	5	PEL	bot	PEL	168.262	no	krill	141.67	6
GTP	GTP09	RPXD0005	5	PEL	bot	PEL	169.762	no	krill	141.67	7
GTP	GTP09	RPXD0005	5	PEL	bot	PEL	170.012	no	krill	141.67	8
GTP	GTP09	RPXD0005	5	PEL	bot	PEL	172.262	no	krill	141.67	9
GTP	GTP09	RPXD0005	5	PEL	bot	PEL	173.012	no	krill	141.67	10
GTP	GTP09	RPXD0005	5	PEL	bot	PEL	174.04	no	krill	141.67	11
GTP	GTP09	RPXD0005	5	PEL	bot	PEL	176.04	no	krill	141.67	12
GTP	GTP09	RPXD0005	5	PEL	bot	PEL	177.012	no	krill	141.67	13
GTP	GTP09	RPXD0005	5	PEL	bot	PEL	178.512	no	krill	141.67	14
GTP	GTP09	RPXD0005	5	PEL	bot	PEL	180.762	no	krill	141.67	15
GTP	GTP09	RPXD0005	5	PEL	bot	PEL	182.305	no	krill	141.67	16
GTP	GTP11	RPXD0001	1	PEL	bot	PEL	47.395	no	fish	NA	NA
GTP	GTP11	RPXD0002	2	PEL	bot	PEL	796.491	no	krill	679.754	1
GTP	GTP11	RPXD0002	2	PEL	bot	PEL	796.868	no	krill	679.754	2
GTP	GTP11	RPXD0002	2	PEL	bot	PEL	797.618	no	krill	679.754	3
GTP	GTP11	RPXD0002	2	PEL	bot	PEL	798.868	no	krill	679.754	4
GTP	GTP11	RPXD0002	2	PEL	bot	PEL	800.118	no	krill	679.754	5
GTP	GTP11	RPXD0002	2	PEL	bot	PEL	801.123	no	krill	679.754	6
GTP	GTP11	RPXD0002	2	PEL	bot	PEL	801.623	no	krill	679.754	7
GTP	GTP11	RPXD0002	2	PEL	bot	PEL	801.874	no	krill	679.754	8
GTP	GTP11	RPXD0002	2	PEL	bot	PEL	803.373	no	krill	679.754	9
GTP	GTP11	RPXD0002	2	PEL	bot	PEL	803.873	no	krill	679.754	10
GTP	GTP11	RPXD0002	2	PEL	bot	PEL	804.373	no	krill	679.754	11
GTP	GTP11	RPXD0002	2	PEL	bot	PEL	805.124	no	krill	679.754	12
GTP	GTP11	RPXD0002	2	PEL	bot	PEL	807.123	no	krill	679.754	13
GTP	GTP11	RPXD0002	2	PEL	bot	PEL	807.623	no	krill	679.754	14
GTP	GTP11	RPXD0002	2	PEL	bot	PEL	811.374	no	krill	679.754	15
GTP	GTP11	RPXD0002	2	PEL	bot	PEL	811.873	no	krill	679.754	16
GTP	GTP11	RPXD0002	2	PEL	bot	PEL	812.124	no	krill	679.754	17
GTP	GTP11	RPXD0002	2	PEL	bot	PEL	812.624	no	krill	679.754	18
GTP	GTP11	RPXD0002	2	PEL	bot	PEL	813.676	no	krill	679.754	19
GTP	GTP11	RPXD0002	2	PEL	bot	PEL	814.385	no	krill	679.754	20
GTP	GTP11	RPXD0002	2	PEL	bot	PEL	815.385	no	krill	679.754	21
GTP	GTP11	RPXD0002	2	PEL	bot	PEL	817.135	no	krill	679.754	22
GTP	GTP11	RPXD0002	2	PEL	bot	PEL	817.635	no	krill	679.754	23
GTP	GTP11	RPXD0002	2	PEL	bot	PEL	818.635	no	krill	679.754	24
GTP	GTP11	RPXD0002	2	PEL	bot	PEL	818.885	no	krill	679.754	25
GTP	GTP11	RPXD0002	2	PEL	bot	PEL	819.635	no	krill	679.754	26
GTP	GTP11	RPXD0002	2	PEL	bot	PEL	822.385	no	krill	679.754	27
GTP	GTP11	RPXD0002	2	PEL	bot	PEL	826.138	no	krill	679.754	28
GTP	GTP11	RPXD0002	2	PEL	bot	PEL	827.635	no	krill	679.754	29
GTP	GTP11	RPXD0002	2	PEL	bot	PEL	828.135	no	krill	679.754	30
GTP	GTP11	RPXD0002	2	PEL	bot	PEL	828.635	no	krill	679.754	31
GTP	GTP11	RPXD0002	2	PEL	bot	PEL	831.135	no	krill	679.754	32
GTP	GTP11	RPXD0002	2	PEL	bot	PEL	831.885	no	krill	679.754	33
GTP	GTP11	RPXD0002	2	PEL	bot	PEL	833.385	no	krill	679.754	34
GTP	GTP11	RPXD0002	2	PEL	bot	PEL	834.885	no	krill	679.754	35
GTP	GTP11	RPXD0002	2	PEL	bot	PEL	835.157	no	krill	679.754	36
GTP	GTP11	RPXD0002	2	PEL	bot	PEL	836.157	no	krill	679.754	37
GTP	GTP11	RPXD0002	2	PEL	bot	PEL	836.657	no	krill	679.754	38
GTP	GTP11	RPXD0002	2	PEL	bot	PEL	837.408	no	krill	679.754	39
GTP	GTP11	RPXD0002	2	PEL	bot	PEL	837.657	no	krill	679.754	40
GTP	GTP11	RPXD0002	2	PEL	bot	PEL	838.157	no	krill	679.754	41
GTP	GTP11	RPXD0002	2	PEL	bot	PEL	838.657	no	krill	679.754	42
GTP	GTP11	RPXD0002	2	PEL	bot	PEL	839.407	no	krill	679.754	43
GTP	GTP11	RPXD0002	2	PEL	bot	PEL	840.411	no	krill	679.754	44
GTP	GTP11	RPXD0002	2	PEL	bot	PEL	840.661	no	krill	679.754	45
GTP	GTP11	RPXD0002	2	PEL	bot	PEL	841.161	no	krill	679.754	46
GTP	GTP11	RPXD0002	2	PEL	bot	PEL	842.411	no	krill	679.754	47
GTP	GTP11	RPXD0002	2	PEL	bot	PEL	844.161	no	krill	679.754	48
GTP	GTP11	RPXD0002	2	PEL	bot	PEL	844.911	no	krill	679.754	49
GTP	GTP11	RPXD0002	2	PEL	bot	PEL	845.911	no	krill	679.754	50
GTP	GTP11	RPXD0002	2	PEL	bot	PEL	846.418	no	krill	679.754	51
GTP	GTP11	RPXD0002	2	PEL	bot	PEL	849.668	no	krill	679.754	52
GTP	GTP11	RPXD0002	2	PEL	bot	PEL	851.668	no	krill	679.754	53
GTP	GTP11	RPXD0002	2	PEL	bot	PEL	852.668	no	krill	679.754	54
GTP	GTP11	RPXD0002	2	PEL	bot	PEL	853.418	no	krill	679.754	55
GTP	GTP11	RPXD0003	3	BENT	asc	PEL	503.303	no	krill	271.101	NA
GTP	GTP11	RPXD0003	4	BENT	asc	PEL	839.911	no	U	637.087	NA
GTP	GTP12	RPXD0001	2	PEL	bot	PEL	706.44	no	squid	681.757	NA
GTP	GTP12	RPXD0001	2	PEL	bot	PEL	714.515	no	squid	681.757	NA
GTP	GTP12	RPXD0001	2	PEL	bot	PEL	717.793	no	squid	681.757	NA
GTP	GTP12	RPXD0001	2	PEL	bot	PEL	744.923	no	squid	681.757	NA
GTP	GTP12	RPXD0002	3	PEL	bot	PEL	113.458	no	krill	80.602	1
GTP	GTP12	RPXD0002	3	PEL	bot	PEL	115.711	no	krill	80.602	2
GTP	GTP12	RPXD0002	3	PEL	bot	PEL	116.462	no	krill	80.602	3
GTP	GTP12	RPXD0002	3	PEL	bot	PEL	124.22	no	krill	80.602	4
GTP	GTP12	RPXD0002	3	PEL	bot	PEL	133.756	no	krill	80.602	5
GTP	GTP12	RPXD0002	3	PEL	bot	PEL	137.47	no	krill	80.602	6
GTP	GTP12	RPXD0002	3	PEL	bot	PEL	151.227	no	krill	80.602	7
GTP	GTP12	RPXD0002	3	PEL	bot	PEL	153.97	no	krill	80.602	8
GTP	GTP12	RPXD0002	3	PEL	bot	PEL	154.836	no	krill	80.602	9
GTP	GTP12	RPXD0002	3	PEL	bot	PEL	157.72	no	krill	80.602	10
GTP	GTP12	RPXD0002	3	PEL	bot	PEL	158.221	no	krill	80.602	11
GTP	GTP12	RPXD0002	3	PEL	bot	PEL	159.97	no	krill	80.602	12
GTP	GTP12	RPXD0002	3	PEL	bot	PEL	160.72	no	krill	80.602	13
GTP	GTP12	RPXD0002	3	PEL	bot	PEL	162.756	no	krill	80.602	14
GTP	GTP12	RPXD0002	3	PEL	bot	PEL	164.756	no	krill	80.602	15
GTP	GTP12	RPXD0002	3	PEL	bot	PEL	165.756	no	krill	80.602	16
GTP	GTP12	RPXD0002	3	PEL	bot	PEL	168.256	no	krill	80.602	17
GTP	GTP12	RPXD0002	4	PEL	bot	PEL	447.506	no	krill	395.762	1
GTP	GTP12	RPXD0002	4	PEL	bot	PEL	448.256	no	krill	395.762	2
GTP	GTP12	RPXD0002	4	PEL	bot	PEL	454.036	no	krill	395.762	3
GTP	GTP12	RPXD0002	4	PEL	bot	PEL	454.537	no	krill	395.762	4
GTP	GTP12	RPXD0002	4	PEL	bot	PEL	456.04	no	krill	395.762	5
GTP	GTP12	RPXD0002	4	PEL	bot	PEL	458.04	no	krill	395.762	6
GTP	GTP12	RPXD0002	4	PEL	bot	PEL	459.29	no	krill	395.762	7
GTP	GTP12	RPXD0002	4	PEL	bot	PEL	484.54	no	krill	395.762	8
GTP	GTP12	RPXD0002	4	PEL	bot	PEL	488.54	no	krill	395.762	9
GTP	GTP12	RPXD0002	4	PEL	bot	PEL	492.29	no	krill	395.762	10
GTP	GTP12	RPXD0002	4	PEL	bot	PEL	494.327	no	krill	395.762	11
GTP	GTP12	RPXD0002	4	PEL	bot	PEL	495.577	no	krill	395.762	12
GTP	GTP12	RPXD0002	4	PEL	bot	PEL	496.829	no	krill	395.762	13
GTP	GTP12	RPXD0002	4	PEL	bot	PEL	497.579	no	krill	395.762	14
GTP	GTP12	RPXD0002	4	PEL	bot	PEL	498.579	no	krill	395.762	15
GTP	GTP12	RPXD0002	4	PEL	bot	PEL	500.329	no	krill	395.762	16
GTP	GTP12	RPXD0002	4	PEL	bot	PEL	502.079	no	krill	395.762	17
GTP	GTP12	RPXD0002	5	PEL	bot	PEL	733.608	no	krill	699.606	1
GTP	GTP12	RPXD0002	5	PEL	bot	PEL	746.817	no	krill	699.606	2
GTP	GTP12	RPXD0002	5	PEL	bot	PEL	747.817	no	krill	699.606	3
GTP	GTP12	RPXD0002	5	PEL	bot	PEL	750.324	no	krill	699.606	4
GTP	GTP12	RPXD0002	5	PEL	bot	PEL	751.824	no	krill	699.606	5
GTP	GTP12	RPXD0002	5	PEL	bot	PEL	758.574	no	krill	699.606	6
GTP	GTP12	RPXD0002	5	PEL	bot	PEL	766.574	no	krill	699.606	7
GTP	GTP12	RPXD0002	5	PEL	bot	PEL	770.074	no	krill	699.606	8
GTP	GTP12	RPXD0002	5	PEL	bot	PEL	774.097	no	krill	699.606	9
GTP	GTP12	RPXD0002	5	PEL	bot	PEL	774.597	no	krill	699.606	10
GTP	GTP12	RPXD0003	6	PEL	bot	PEL	217.309	no	krill	142.351	1
GTP	GTP12	RPXD0003	6	PEL	bot	PEL	218.809	no	krill	142.351	2
GTP	GTP12	RPXD0003	6	PEL	bot	PEL	221.559	no	krill	142.351	3
GTP	GTP12	RPXD0003	6	PEL	bot	PEL	235.059	no	krill	142.351	4
GTP	GTP12	RPXD0003	6	PEL	bot	PEL	239.309	no	krill	142.351	5
GTP	GTP13	RPXD0001	1	BENT	desc	PEL	100.191	no	U	10.612	1
GTP	GTP13	RPXD0001	1	BENT	bot	BENT	173.14	no	U	10.612	NA
GTP	GTP13	RPXD0001	1	BENT	bot	BENT	179.479	no	U	10.612	NA
GTP	GTP13	RPXD0001	1	BENT	asc	PEL	204.296	no	U	10.612	NA
GTP	GTP13	RPXD0001	1	BENT	asc	PEL	212.779	yes	fish	10.612	NA
GTP	GTP13	RPXD0001	1	BENT	asc	PEL	216.083	yes	fish	10.612	NA
GTP	GTP13	RPXD0001	1	BENT	asc	PEL	217.484	yes	fish	10.612	NA
GTP	GTP13	RPXD0001	1	BENT	asc	PEL	219.686	yes	fish	10.612	NA
GTP	GTP13	RPXD0001	1	BENT	asc	PEL	220.587	yes	fish	10.612	NA
GTP	GTP13	RPXD0001	1	BENT	asc	PEL	222.312	no	fish	10.612	NA
GTP	GTP13	RPXD0001	1	BENT	asc	PEL	225.317	yes	fish	10.612	NA
GTP	GTP13	RPXD0001	1	BENT	asc	PEL	239.094	no	fish	10.612	NA
GTP	GTP13	RPXD0001	2	BENT	bot	BENT	711.787	no	U	590.83	NA
GTP	GTP13	RPXD0001	2	BENT	asc	PEL	782.105	no	fish	590.83	NA
GTP	GTP13	RPXD0001	2	BENT	asc	PEL	787.054	yes	fish	590.83	NA
GTP	GTP13	RPXD0001	2	BENT	asc	PEL	792.114	no	U	590.83	NA
GTP	GTP13	RPXD0001	2	BENT	asc	PEL	799.873	no	fish	590.83	NA
GTP	GTP13	RPXD0001	2	BENT	asc	PEL	834.155	no	krill	590.83	NA
GTP	GTP13	RPXD0004	3	BENT	bot	BENT	60.908	no	U	NA	NA
GTP	GTP13	RPXD0004	4	BENT	bot	BENT	377.213	no	U	288.128	NA
GTP	GTP13	RPXD0004	5	BENT	bot	BENT	745.569	no	U	613.359	NA
GTP	GTP13	RPXD0004	5	BENT	bot	BENT	755.069	no	U	613.359	NA
GTP	GTP13	RPXD0004	5	BENT	bot	BENT	759.569	no	U	613.359	NA
GTP	GTP13	RPXD0004	5	BENT	bot	BENT	787.86	no	U	613.359	NA
GTP	GTP13	RPXD0004	5	BENT	bot	BENT	789.863	no	U	613.359	NA
GTP	GTP13	RPXD0004	5	BENT	asc	PEL	841.608	no	U	613.359	NA
GTP	GTP14	RPXD0001	1	PEL	bot	PEL	401.236	no	krill	293.852	1
GTP	GTP14	RPXD0001	1	PEL	bot	PEL	401.986	no	krill	293.852	2
GTP	GTP14	RPXD0001	1	PEL	bot	PEL	402.486	no	krill	293.852	3
GTP	GTP14	RPXD0001	1	PEL	bot	PEL	402.986	no	krill	293.852	4
GTP	GTP14	RPXD0001	1	PEL	bot	PEL	403.486	no	krill	293.852	5
GTP	GTP14	RPXD0001	1	PEL	bot	PEL	403.99	no	krill	293.852	6
GTP	GTP14	RPXD0001	1	PEL	bot	PEL	404.741	no	krill	293.852	7
GTP	GTP14	RPXD0001	1	PEL	bot	PEL	406.491	no	krill	293.852	8
GTP	GTP14	RPXD0001	1	PEL	bot	PEL	408.991	no	krill	293.852	9
GTP	GTP14	RPXD0001	1	PEL	bot	PEL	409.494	no	krill	293.852	10
GTP	GTP14	RPXD0001	1	PEL	bot	PEL	412.244	no	krill	293.852	11
GTP	GTP14	RPXD0001	1	PEL	bot	PEL	413.994	no	krill	293.852	12
GTP	GTP14	RPXD0001	1	PEL	bot	PEL	414.494	no	krill	293.852	13
GTP	GTP14	RPXD0001	1	PEL	bot	PEL	417.244	no	krill	293.852	14
GTP	GTP14	RPXD0001	1	PEL	bot	PEL	417.994	no	krill	293.852	15
GTP	GTP14	RPXD0001	1	PEL	bot	PEL	421.506	no	krill	293.852	16
GTP	GTP14	RPXD0001	1	PEL	bot	PEL	422.006	no	krill	293.852	17
GTP	GTP14	RPXD0001	1	PEL	bot	PEL	424.506	no	krill	293.852	18
GTP	GTP14	RPXD0001	1	PEL	bot	PEL	424.756	no	krill	293.852	19
GTP	GTP14	RPXD0001	1	PEL	bot	PEL	427.258	no	krill	293.852	20
GTP	GTP14	RPXD0001	1	PEL	bot	PEL	428.756	no	krill	293.852	21
GTP	GTP14	RPXD0001	1	PEL	bot	PEL	429.119	no	krill	293.852	22
GTP	GTP14	RPXD0001	1	PEL	bot	PEL	439.506	no	krill	293.852	23
GTP	GTP14	RPXD0001	1	PEL	bot	PEL	440.541	no	krill	293.852	24
GTP	GTP14	RPXD0001	1	PEL	bot	PEL	441.256	no	krill	293.852	25
GTP	GTP14	RPXD0001	1	PEL	bot	PEL	441.756	no	krill	293.852	26
GTP	GTP14	RPXD0001	1	PEL	bot	PEL	442.005	no	krill	293.852	27
GTP	GTP14	RPXD0001	1	PEL	bot	PEL	443.756	no	krill	293.852	28
GTP	GTP14	RPXD0001	1	PEL	bot	PEL	444.506	no	krill	293.852	29
GTP	GTP14	RPXD0001	1	PEL	bot	PEL	445.758	no	krill	293.852	30
GTP	GTP14	RPXD0001	1	PEL	bot	PEL	448.006	no	krill	293.852	31
GTP	GTP14	RPXD0001	1	PEL	bot	PEL	451.006	no	krill	293.852	32
GTP	GTP14	RPXD0001	1	PEL	bot	PEL	454.288	no	krill	293.852	33
GTP	GTP14	RPXD0001	1	PEL	bot	PEL	455.039	no	krill	293.852	34
GTP	GTP14	RPXD0001	1	PEL	bot	PEL	455.29	no	krill	293.852	35
GTP	GTP14	RPXD0001	1	PEL	bot	PEL	456.79	no	krill	293.852	36
GTP	GTP14	RPXD0001	1	PEL	bot	PEL	459.54	no	krill	293.852	37
GTP	GTP14	RPXD0001	1	PEL	bot	PEL	471.554	no	krill	293.852	38
GTP	GTP14	RPXD0001	1	PEL	bot	PEL	477.31	no	krill	293.852	39
GTP	GTP14	RPXD0001	2	PEL	bot	PEL	773.596	no	U	647.317	1
GTP	GTP14	RPXD0001	2	PEL	bot	PEL	805.878	no	krill	647.317	2
KPN	KPN15	RPXD0001	1	PEL	bot	PEL	74.395	no	fish	NA	NA
KPN	KPN15	RPXD0001	1	PEL	bot	PEL	78.145	no	fish	NA	NA
KPN	KPN15	RPXD0001	2	PEL	bot	PEL	316.116	yes	fish	236.323	1
KPN	KPN15	RPXD0001	2	PEL	bot	PEL	319.646	no	fish	236.323	2
KPN	KPN15	RPXD0001	2	PEL	bot	PEL	322.411	no	fish	236.323	3
KPN	KPN15	RPXD0001	2	PEL	bot	PEL	326.898	no	fish	236.323	4
KPN	KPN15	RPXD0001	2	PEL	bot	PEL	339.896	no	fish	236.323	5
KPN	KPN15	RPXD0001	2	PEL	bot	PEL	344.646	no	fish	236.323	6
KPN	KPN15	RPXD0001	2	PEL	bot	PEL	348.901	no	fish	236.323	7
KPN	KPN15	RPXD0001	2	PEL	bot	PEL	350.93	no	fish	236.323	8
KPN	KPN15	RPXD0001	2	PEL	bot	PEL	355.43	no	fish	236.323	9
KPN	KPN15	RPXD0001	2	PEL	bot	PEL	387.68	no	fish	236.323	10
KPN	KPN15	RPXD0001	2	PEL	bot	PEL	393.432	no	fish	236.323	11
KPN	KPN15	RPXD0001	2	PEL	bot	PEL	405.682	no	fish	236.323	12
KPN	KPN15	RPXD0001	3	PEL	bot	PEL	696.163	yes	fish	559.092	1
KPN	KPN15	RPXD0001	3	PEL	bot	PEL	697.272	no	fish	559.092	2
KPN	KPN15	RPXD0001	3	PEL	bot	PEL	711.015	no	fish	559.092	3
KPN	KPN15	RPXD0001	3	PEL	bot	PEL	713.764	no	fish	559.092	4
KPN	KPN15	RPXD0001	3	PEL	bot	PEL	721.295	no	fish	559.092	5
KPN	KPN15	RPXD0001	3	PEL	bot	PEL	723.295	no	fish	559.092	6
KPN	KPN15	RPXD0001	3	PEL	bot	PEL	729.264	no	fish	559.092	7
KPN	KPN15	RPXD0001	3	PEL	bot	PEL	730.798	no	fish	559.092	8
KPN	KPN15	RPXD0001	3	PEL	bot	PEL	736.803	no	fish	559.092	9
KPN	KPN15	RPXD0001	3	PEL	bot	PEL	741.058	no	fish	559.092	10
KPN	KPN15	RPXD0001	3	PEL	bot	PEL	746.559	no	fish	559.092	11
KPN	KPN15	RPXD0001	3	PEL	bot	PEL	766.809	no	fish	559.092	12
KPN	KPN15	RPXD0001	3	PEL	bot	PEL	770.809	no	fish	559.092	13
KPN	KPN15	RPXD0001	3	PEL	bot	PEL	775.593	no	fish	559.092	14
KPN	KPN15	RPXD0001	3	PEL	bot	PEL	778.315	no	fish	559.092	15
KPN	KPN15	RPXD0002	5	PEL	bot	PEL	623.702	yes	fish	460.73	1
KPN	KPN15	RPXD0003	6	PEL	bot	PEL	334.173	no	fish	208.342	1
KPN	KPN15	RPXD0003	6	PEL	bot	PEL	335.171	no	fish	208.342	2
KPN	KPN15	RPXD0003	6	PEL	bot	PEL	339.218	no	fish	208.342	3
KPN	KPN15	RPXD0003	6	PEL	bot	PEL	340.171	no	fish	208.342	4
KPN	KPN15	RPXD0003	6	PEL	bot	PEL	353.441	no	fish	208.342	5
KPN	KPN15	RPXD0003	6	PEL	bot	PEL	355.822	yes	fish	208.342	6
KPN	KPN15	RPXD0003	6	PEL	bot	PEL	357.171	no	fish	208.342	7
KPN	KPN15	RPXD0003	6	PEL	bot	PEL	359.196	no	U	208.342	8
KPN	KPN15	RPXD0003	6	PEL	bot	PEL	361.946	no	fish	208.342	9
KPN	KPN15	RPXD0003	6	PEL	bot	PEL	368.705	no	U	208.342	10
KPN	KPN15	RPXD0003	6	PEL	bot	PEL	369.455	no	fish	208.342	11
KPN	KPN15	RPXD0003	6	PEL	bot	PEL	380.205	no	fish	208.342	12
KPN	KPN15	RPXD0003	6	PEL	bot	PEL	385.705	no	fish	208.342	13
KPN	KPN15	RPXD0003	6	PEL	bot	PEL	387.788	yes	fish	208.342	14
KPN	KPN15	RPXD0003	6	PEL	bot	PEL	389.226	yes	U	208.342	15
KPN	KPN15	RPXD0003	6	PEL	bot	PEL	392.479	no	fish	208.342	16
KPN	KPN15	RPXD0003	6	PEL	bot	PEL	398.422	no	fish	208.342	17
KPN	KPN15	RPXD0003	7	PEL	bot	PEL	678.045	yes	fish	545.822	1
KPN	KPN15	RPXD0003	7	PEL	bot	PEL	682.259	no	fish	545.822	2
KPN	KPN15	RPXD0003	7	PEL	bot	PEL	686.259	no	fish	545.822	3
KPN	KPN15	RPXD0003	7	PEL	bot	PEL	688.259	no	fish	545.822	4
KPN	KPN15	RPXD0003	7	PEL	bot	PEL	694.628	yes	U	545.822	5
KPN	KPN15	RPXD0003	7	PEL	bot	PEL	696.522	no	U	545.822	6
KPN	KPN15	RPXD0003	7	PEL	bot	PEL	697.364	yes	fish	545.822	7
KPN	KPN15	RPXD0003	7	PEL	bot	PEL	711.524	no	fish	545.822	8
KPN	KPN15	RPXD0003	7	PEL	bot	PEL	718.524	no	fish	545.822	9
KPN	KPN15	RPXD0003	7	PEL	bot	PEL	721.243	no	fish	545.822	10
KPN	KPN15	RPXD0003	7	PEL	bot	PEL	725.058	no	fish	545.822	11
KPN	KPN15	RPXD0003	7	PEL	bot	PEL	729.83	no	fish	545.822	12
KPN	KPN15	RPXD0003	7	PEL	asc	PEL	759.426	yes	fish	545.822	13
KPN	KPN15	RPXD0003	7	PEL	asc	PEL	760.46	no	fish	545.822	14
KPN	KPN15	RPXD0004	8	PEL	bot	PEL	82.929	no	fish	NA	1
KPN	KPN15	RPXD0004	8	PEL	bot	PEL	85.052	no	fish	NA	2
KPN	KPN15	RPXD0004	8	PEL	bot	PEL	87.154	yes	fish	NA	3
KPN	KPN15	RPXD0004	8	PEL	bot	PEL	97.682	no	fish	NA	4
KPN	KPN15	RPXD0004	8	PEL	bot	PEL	99.947	no	fish	NA	5
KPN	KPN15	RPXD0004	8	PEL	bot	PEL	101.445	no	fish	NA	6
KPN	KPN15	RPXD0004	8	PEL	bot	PEL	102.698	no	fish	NA	7
KPN	KPN15	RPXD0004	8	PEL	bot	PEL	104.696	no	fish	NA	8
KPN	KPN15	RPXD0004	8	PEL	bot	PEL	107.196	no	fish	NA	9
KPN	KPN15	RPXD0004	8	PEL	bot	PEL	108.31	no	fish	NA	10
KPN	KPN15	RPXD0004	8	PEL	bot	PEL	115.196	no	fish	NA	11
KPN	KPN15	RPXD0004	8	PEL	bot	PEL	115.696	no	fish	NA	12
KPN	KPN15	RPXD0004	8	PEL	bot	PEL	119.196	no	fish	NA	13
KPN	KPN15	RPXD0004	8	PEL	bot	PEL	120.196	no	fish	NA	14
KPN	KPN15	RPXD0004	8	PEL	bot	PEL	123.196	no	fish	NA	15
KPN	KPN15	RPXD0004	8	PEL	bot	PEL	125.221	no	fish	NA	16
KPN	KPN15	RPXD0004	8	PEL	bot	PEL	129.196	no	fish	NA	17
KPN	KPN15	RPXD0004	8	PEL	bot	PEL	136.231	no	fish	NA	18
KPN	KPN15	RPXD0004	8	PEL	bot	PEL	138.481	no	fish	NA	19
KPN	KPN15	RPXD0004	8	PEL	bot	PEL	143.196	no	fish	NA	20
KPN	KPN15	RPXD0004	8	PEL	bot	PEL	147.196	no	fish	NA	21
KPN	KPN15	RPXD0004	8	PEL	asc	PEL	150.695	no	fish	NA	22
KPN	KPN15	RPXD0004	9	PEL	bot	PEL	384.72	no	fish	284.066	1
KPN	KPN15	RPXD0004	9	PEL	bot	PEL	391.477	no	fish	284.066	2
KPN	KPN15	RPXD0005	10	PEL	bot	PEL	169.264	yes	fish	NA	1
KPN	KPN15	RPXD0005	10	PEL	bot	PEL	176.513	no	fish	NA	2
KPN	KPN15	RPXD0005	10	PEL	bot	PEL	178.263	no	fish	NA	3
KPN	KPN15	RPXD0005	10	PEL	bot	PEL	179.78	yes	fish	NA	4
KPN	KPN15	RPXD0005	10	PEL	bot	PEL	182.149	yes	fish	NA	5
KPN	KPN15	RPXD0005	10	PEL	bot	PEL	190.157	yes	fish	NA	6
KPN	KPN15	RPXD0005	10	PEL	bot	PEL	194.034	no	fish	NA	7
KPN	KPN15	RPXD0005	10	PEL	asc	PEL	199.291	no	fish	NA	8
KPN	KPN15	RPXD0007	12	PEL	bot	PEL	78.612	yes	fish	NA	1
KPN	KPN24	RPXD0003	3	PEL	bot	PEL	19.618	no	fish	NA	NA
KPN	KPN24	RPXD0003	3	PEL	asc	PEL	54.883	no	fish	NA	NA
KPN	KPN24	RPXD0003	4	PEL	bot	PEL	250.484	yes	fish	165.686	1
KPN	KPN24	RPXD0003	4	PEL	bot	PEL	256.39	no	fish	165.686	2
KPN	KPN24	RPXD0003	4	PEL	bot	PEL	260.928	yes	U	165.686	3
KPN	KPN24	RPXD0003	4	PEL	bot	PEL	266.133	yes	U	165.686	4
KPN	KPN24	RPXD0003	4	PEL	bot	PEL	271.038	no	fish	165.686	5
KPN	KPN24	RPXD0003	4	PEL	bot	PEL	278.118	no	fish	165.686	6
KPN	KPN24	RPXD0003	4	PEL	bot	PEL	292.259	no	U	165.686	7
KPN	KPN24	RPXD0003	4	PEL	bot	PEL	301.501	no	U	165.686	8
KPN	KPN24	RPXD0003	4	PEL	bot	PEL	311.311	no	fish	165.686	9
KPN	KPN24	RPXD0003	4	PEL	bot	PEL	312.651	no	fish	165.686	11
KPN	KPN24	RPXD0003	4	PEL	bot	PEL	331.765	yes	fish	165.686	12
KPN	KPN24	RPXD0003	4	PEL	bot	PEL	333.171	no	fish	165.686	13
KPN	KPN24	RPXD0003	4	PEL	bot	PEL	347.685	no	fish	165.686	14
KPN	KPN24	RPXD0004	5	PEL	bot	PEL	135.23	no	fish	31.13	1
KPN	KPN24	RPXD0004	5	PEL	bot	PEL	141.236	no	fish	31.13	2
KPN	KPN24	RPXD0004	5	PEL	bot	PEL	169.013	no	U	31.13	3
KPN	KPN24	RPXD0004	5	PEL	bot	PEL	172.016	no	U	31.13	4
KPN	KPN24	RPXD0004	5	PEL	bot	PEL	179.246	no	U	31.13	5
MRP	MRP19	RPXD0003	1	PEL	bot	PEL	201.794	no	krill	152.107	1
MRP	MRP19	RPXD0005	3	PEL	bot	PEL	79.675	no	U	18.617	1
MRP	MRP19	RPXD0005	3	PEL	bot	PEL	82.677	no	U	18.617	2
MRP	MRP19	RPXD0005	3	PEL	bot	PEL	83.681	no	U	18.617	3
MRP	MRP19	RPXD0005	3	PEL	bot	PEL	96.443	no	krill	18.617	4
MRP	MRP19	RPXD0005	3	PEL	bot	PEL	98.444	no	krill	18.617	5
MRP	MRP19	RPXD0005	3	PEL	bot	PEL	99.458	no	krill	18.617	6
MRP	MRP19	RPXD0005	3	PEL	bot	PEL	100.195	no	krill	18.617	7
MRP	MRP19	RPXD0005	3	PEL	bot	PEL	101.195	no	krill	18.617	8
MRP	MRP19	RPXD0005	3	PEL	bot	PEL	102.695	no	krill	18.617	9
MRP	MRP19	RPXD0005	3	PEL	bot	PEL	103.445	no	krill	18.617	10
MRP	MRP19	RPXD0005	3	PEL	bot	PEL	103.45	no	krill	18.617	11
MRP	MRP19	RPXD0005	3	PEL	bot	PEL	103.95	no	krill	18.617	12
MRP	MRP19	RPXD0005	3	PEL	bot	PEL	104.7	no	krill	18.617	13
MRP	MRP19	RPXD0005	3	PEL	bot	PEL	105.2	no	krill	18.617	14
MRP	MRP19	RPXD0005	3	PEL	bot	PEL	105.95	no	krill	18.617	15
MRP	MRP19	RPXD0005	3	PEL	bot	PEL	106.95	no	krill	18.617	16
MRP	MRP19	RPXD0005	3	PEL	bot	PEL	107.707	no	krill	18.617	17
MRP	MRP19	RPXD0005	3	PEL	bot	PEL	108.2	no	krill	18.617	18
MRP	MRP19	RPXD0005	3	PEL	bot	PEL	108.45	no	krill	18.617	19
MRP	MRP19	RPXD0005	3	PEL	bot	PEL	119.214	no	krill	18.617	20
MRP	MRP19	RPXD0005	3	PEL	bot	PEL	124.214	yes	krill	18.617	21
MRP	MRP19	RPXD0005	3	PEL	bot	PEL	125.214	no	krill	18.617	22
MRP	MRP19	RPXD0005	3	PEL	bot	PEL	125.714	no	krill	18.617	23
MRP	MRP19	RPXD0005	3	PEL	bot	PEL	126.714	no	krill	18.617	24
MRP	MRP19	RPXD0005	3	PEL	bot	PEL	127.464	no	krill	18.617	25
MRP	MRP19	RPXD0005	3	PEL	bot	PEL	133.714	no	krill	18.617	26
MRP	MRP19	RPXD0005	3	PEL	bot	PEL	140.229	no	krill	18.617	27
MRP	MRP19	RPXD0006	5	PEL	bot	PEL	233.5	no	krill	159.753	1
MRP	MRP19	RPXD0006	5	PEL	bot	PEL	234.826	no	krill	159.753	2
MRP	MRP19	RPXD0006	5	PEL	bot	PEL	235.576	no	krill	159.753	3
MRP	MRP19	RPXD0006	5	PEL	bot	PEL	236.078	no	krill	159.753	4
MRP	MRP19	RPXD0006	5	PEL	bot	PEL	236.827	no	krill	159.753	5
MRP	MRP19	RPXD0006	5	PEL	bot	PEL	237.638	no	krill	159.753	6
MRP	MRP19	RPXD0006	5	PEL	bot	PEL	238.33	no	krill	159.753	7
MRP	MRP19	RPXD0006	5	PEL	bot	PEL	238.83	no	krill	159.753	8
MRP	MRP19	RPXD0006	5	PEL	bot	PEL	240.58	no	krill	159.753	9
MRP	MRP19	RPXD0006	5	PEL	bot	PEL	241.08	no	krill	159.753	10
MRP	MRP19	RPXD0006	5	PEL	bot	PEL	241.58	no	krill	159.753	11
MRP	MRP19	RPXD0006	5	PEL	bot	PEL	242.33	no	krill	159.753	12
MRP	MRP19	RPXD0006	5	PEL	bot	PEL	244.085	no	krill	159.753	13
MRP	MRP19	RPXD0006	5	PEL	bot	PEL	244.335	no	krill	159.753	14
MRP	MRP19	RPXD0006	5	PEL	bot	PEL	247.085	no	krill	159.753	15
MRP	MRP19	RPXD0006	5	PEL	bot	PEL	248.589	no	krill	159.753	16
MRP	MRP19	RPXD0006	5	PEL	bot	PEL	248.841	no	krill	159.753	17
MRP	MRP19	RPXD0006	5	PEL	bot	PEL	251.839	no	krill	159.753	18
MRP	MRP19	RPXD0006	5	PEL	bot	PEL	252.591	no	krill	159.753	19
MRP	MRP19	RPXD0006	5	PEL	bot	PEL	253.339	no	krill	159.753	20
MRP	MRP19	RPXD0006	5	PEL	bot	PEL	253.839	no	krill	159.753	21
MRP	MRP19	RPXD0006	5	PEL	bot	PEL	254.843	no	krill	159.753	22
MRP	MRP20	RPXD0001	1	PEL	bot	PEL	37.88	no	U	NA	NA
MRP	MRP20	RPXD0001	1	PEL	bot	PEL	38.636	no	U	NA	NA
MRP	MRP20	RPXD0001	1	PEL	bot	PEL	39.887	no	U	NA	NA
MRP	MRP20	RPXD0001	1	PEL	bot	PEL	59.86	no	U	NA	NA
MRP	MRP20	RPXD0001	1	PEL	bot	PEL	67.412	no	U	NA	NA
MRP	MRP20	RPXD0001	1	PEL	bot	PEL	77.163	no	krill	NA	NA
MRP	MRP20	RPXD0001	2	PEL	bot	PEL	197.531	no	krill	154.749	1
MRP	MRP20	RPXD0001	2	PEL	bot	PEL	212.805	no	U	154.749	2
MRP	MRP20	RPXD0001	2	PEL	bot	PEL	215.057	no	U	154.749	3
MRP	MRP20	RPXD0001	2	PEL	bot	PEL	224.557	no	U	154.749	4
MRP	MRP20	RPXD0001	2	PEL	asc	PEL	268.402	no	U	154.749	5
MRP	MRP20	RPXD0001	3	PEL	bot	PEL	427.762	no	U	348.433	1
MRP	MRP20	RPXD0001	3	PEL	bot	PEL	441.642	no	krill	348.433	2
MRP	MRP20	RPXD0001	3	PEL	bot	PEL	446.532	no	U	348.433	3
MRP	MRP20	RPXD0001	3	PEL	bot	PEL	454.289	no	U	348.433	4
MRP	MRP20	RPXD0001	3	PEL	bot	PEL	455.289	no	U	348.433	5
MRP	MRP20	RPXD0001	3	PEL	bot	PEL	458.789	no	U	348.433	6
MRP	MRP20	RPXD0001	3	PEL	bot	PEL	467.551	no	U	348.433	7
MRP	MRP20	RPXD0001	4	PEL	bot	PEL	612.186	no	U	547.629	1
MRP	MRP20	RPXD0001	4	PEL	bot	PEL	621.694	no	U	547.629	2
MRP	MRP20	RPXD0001	4	PEL	bot	PEL	635.964	no	krill	547.629	3
MRP	MRP20	RPXD0001	4	PEL	bot	PEL	639.468	no	U	547.629	4
MRP	MRP20	RPXD0001	4	PEL	bot	PEL	640.719	no	U	547.629	5
MRP	MRP20	RPXD0001	5	PEL	bot	PEL	778.612	no	U	713.019	1
MRP	MRP20	RPXD0001	5	PEL	bot	PEL	782.853	no	U	713.019	2
MRP	MRP20	RPXD0001	5	PEL	bot	PEL	791.103	no	krill	713.019	3
MRP	MRP20	RPXD0001	5	PEL	bot	PEL	792.614	no	U	713.019	4
MRP	MRP20	RPXD0001	5	PEL	bot	PEL	800.367	no	krill	713.019	5
MRP	MRP20	RPXD0001	5	PEL	bot	PEL	802.625	no	krill	713.019	6
MRP	MRP20	RPXD0001	5	PEL	asc	PEL	811.884	no	krill	713.019	7
MRP	MRP20	RPXD0004	6	PEL	bot	PEL	783.356	no	U	707.874	1
MRP	MRP20	RPXD0005	7	PEL	bot	PEL	90.686	no	U	46.645	1
MRP	MRP20	RPXD0005	7	PEL	bot	PEL	92.186	no	U	46.645	2
MRP	MRP20	RPXD0005	7	PEL	bot	PEL	93.439	no	krill	46.645	3
MRP	MRP20	RPXD0005	7	PEL	bot	PEL	95.189	no	krill	46.645	4
MRP	MRP20	RPXD0005	7	PEL	bot	PEL	95.939	no	krill	46.645	5
MRP	MRP20	RPXD0005	7	PEL	bot	PEL	96.943	no	U	46.645	6
MRP	MRP20	RPXD0005	7	PEL	bot	PEL	97.461	no	U	46.645	7
MRP	MRP20	RPXD0005	7	PEL	bot	PEL	102.193	no	U	46.645	8
MRP	MRP20	RPXD0005	7	PEL	bot	PEL	102.944	no	U	46.645	9
MRP	MRP20	RPXD0005	7	PEL	bot	PEL	109.943	no	U	46.645	10
MRP	MRP20	RPXD0005	7	PEL	bot	PEL	110.193	no	U	46.645	11
MRP	MRP20	RPXD0005	7	PEL	bot	PEL	110.943	no	U	46.645	12
MRP	MRP20	RPXD0005	7	PEL	bot	PEL	111.958	no	U	46.645	13
MRP	MRP20	RPXD0005	7	PEL	bot	PEL	112.708	no	U	46.645	14
MRP	MRP20	RPXD0005	7	PEL	bot	PEL	114.458	no	U	46.645	15
MRP	MRP20	RPXD0005	7	PEL	bot	PEL	115.458	no	U	46.645	16
MRP	MRP20	RPXD0005	7	PEL	bot	PEL	116.458	no	U	46.645	17
MRP	MRP20	RPXD0005	7	PEL	bot	PEL	117.958	no	U	46.645	18
MRP	MRP20	RPXD0005	7	PEL	bot	PEL	118.708	no	U	46.645	19
MRP	MRP20	RPXD0005	7	PEL	bot	PEL	119.965	no	krill	46.645	20
MRP	MRP20	RPXD0005	7	PEL	bot	PEL	120.965	no	krill	46.645	21
MRP	MRP20	RPXD0005	7	PEL	bot	PEL	121.465	no	krill	46.645	22
MRP	MRP20	RPXD0005	7	PEL	bot	PEL	121.965	no	krill	46.645	23
MRP	MRP20	RPXD0005	7	PEL	bot	PEL	122.215	no	krill	46.645	24
MRP	MRP20	RPXD0005	7	PEL	bot	PEL	123.965	no	krill	46.645	25
MRP	MRP20	RPXD0005	7	PEL	bot	PEL	124.965	no	krill	46.645	26
MRP	MRP20	RPXD0005	7	PEL	bot	PEL	125.721	no	krill	46.645	27
MRP	MRP20	RPXD0005	7	PEL	bot	PEL	126.222	no	krill	46.645	28
MRP	MRP20	RPXD0005	7	PEL	bot	PEL	128.972	no	krill	46.645	29
MRP	MRP20	RPXD0005	7	PEL	bot	PEL	129.475	no	krill	46.645	30
MRP	MRP20	RPXD0005	7	PEL	bot	PEL	131.727	no	krill	46.645	31
MRP	MRP20	RPXD0005	7	PEL	bot	PEL	132.227	no	krill	46.645	32
MRP	MRP20	RPXD0005	7	PEL	bot	PEL	133.727	no	krill	46.645	33
MRP	MRP20	RPXD0005	7	PEL	bot	PEL	135.227	no	krill	46.645	34
MRP	MRP20	RPXD0005	7	PEL	bot	PEL	135.977	no	krill	46.645	35
MRP	MRP20	RPXD0005	7	PEL	bot	PEL	136.727	no	krill	46.645	36
MRP	MRP20	RPXD0005	7	PEL	bot	PEL	137.227	no	krill	46.645	37
MRP	MRP20	RPXD0005	7	PEL	bot	PEL	137.727	no	krill	46.645	38
MRP	MRP20	RPXD0005	7	PEL	bot	PEL	137.977	no	krill	46.645	39
MRP	MRP20	RPXD0005	7	PEL	bot	PEL	138.483	no	krill	46.645	40
MRP	MRP20	RPXD0005	7	PEL	bot	PEL	139.227	no	krill	46.645	41
MRP	MRP20	RPXD0005	7	PEL	bot	PEL	139.977	no	krill	46.645	42
MRP	MRP20	RPXD0005	7	PEL	bot	PEL	141.227	no	krill	46.645	43
MRP	MRP20	RPXD0005	7	PEL	bot	PEL	142.487	no	krill	46.645	44
MRP	MRP20	RPXD0005	7	PEL	bot	PEL	143.737	no	krill	46.645	45
MRP	MRP20	RPXD0005	7	PEL	bot	PEL	143.987	no	krill	46.645	46
MRP	MRP20	RPXD0005	7	PEL	bot	PEL	144.239	no	krill	46.645	47
MRP	MRP20	RPXD0005	7	PEL	bot	PEL	144.489	no	krill	46.645	48
MRP	MRP20	RPXD0005	7	PEL	bot	PEL	147.997	no	krill	46.645	49
MRP	MRP20	RPXD0005	7	PEL	bot	PEL	148.491	no	krill	46.645	50
MRP	MRP20	RPXD0005	7	PEL	bot	PEL	153.742	no	krill	46.645	51
MRP	MRP20	RPXD0005	7	PEL	bot	PEL	154.244	no	krill	46.645	52
MRP	MRP20	RPXD0005	7	PEL	bot	PEL	154.497	no	krill	46.645	53
MRP	MRP20	RPXD0005	7	PEL	bot	PEL	156.491	no	krill	46.645	54
MRP	MRP20	RPXD0005	7	PEL	bot	PEL	157.742	no	krill	46.645	55
MRP	MRP20	RPXD0005	7	PEL	bot	PEL	161.991	no	krill	46.645	56
MRP	MRP20	RPXD0005	7	PEL	bot	PEL	162.742	no	krill	46.645	57
MRP	MRP20	RPXD0005	7	PEL	bot	PEL	163.491	no	krill	46.645	58
MRP	MRP20	RPXD0005	7	PEL	bot	PEL	164.242	no	krill	46.645	59
MRP	MRP20	RPXD0005	7	PEL	bot	PEL	165.241	no	krill	46.645	60
MRP	MRP20	RPXD0005	7	PEL	bot	PEL	165.491	no	krill	46.645	61
MRP	MRP20	RPXD0005	7	PEL	bot	PEL	166.51	no	krill	46.645	62
MRP	MRP20	RPXD0005	7	PEL	bot	PEL	167.01	no	krill	46.645	63
MRP	MRP20	RPXD0005	7	PEL	bot	PEL	168.26	no	krill	46.645	64
MRP	MRP20	RPXD0005	7	PEL	bot	PEL	168.51	no	krill	46.645	65
MRP	MRP20	RPXD0005	7	PEL	bot	PEL	169.515	no	krill	46.645	66
MRP	MRP20	RPXD0005	7	PEL	bot	PEL	170.264	no	krill	46.645	67
MRP	MRP20	RPXD0005	7	PEL	bot	PEL	170.76	no	krill	46.645	68
MRP	MRP20	RPXD0005	7	PEL	bot	PEL	171.01	no	krill	46.645	69
MRP	MRP20	RPXD0005	7	PEL	bot	PEL	171.51	no	krill	46.645	70
MRP	MRP20	RPXD0005	7	PEL	bot	PEL	171.76	no	krill	46.645	71
MRP	MRP20	RPXD0005	7	PEL	bot	PEL	172.76	no	krill	46.645	72
MRP	MRP20	RPXD0005	7	PEL	bot	PEL	174.513	no	krill	46.645	73
MRP	MRP20	RPXD0005	7	PEL	bot	PEL	175.51	no	krill	46.645	74
